# Supplementary material for: Magmatic Processes of Granitoids in the Hongniu-Hongshan Porphyry-Skarn Copper Deposit, Southern Yidun Terrane, China: Evidence from Mineral Geochemistry
Source: MDPI journal article supplement (doi:10.3390/min12121559), 2022-12-02
Supplement: s1 [file s1]

Archive with 5 entries (5 files):
- Supplementary Methods.pdf
- Table S1 Whole-rock data.xlsx
- Table S2 EPMA data.xlsx
- Table S3 LA-ICP-MS data.xlsx
- Table S4 Collected whole-rock data of the Hongniu-Hongshan granitoids.xlsx
