# Supplementary material for: Magmatic Processes of Granitoids in the Hongniu-Hongshan Porphyry-Skarn Copper Deposit, Southern Yidun Terrane, China: Evidence from Mineral Geochemistry
Source: MDPI journal article supplement (doi:10.3390/min12121559), 2022-12-02
Supplement: s1 [file s1 › Table S1 Whole-rock data.xlsx]

## Sheet: Major elements
	Sample	GSR-3	GSD-4	GSD-6	OU-6	GSR-12	GSR-13	GSR-3	GSD-4	GSD-6	OU-6	GSR-12	GSR-13	7ZK50-1184	7ZK50-1209	7ZK52-1225	11ZK52-1095	11ZK52-1174	11ZK54-964	11ZK55-993	11ZK55-999
	Comment	Reference values						Test values						Whole-rock samples
	SiO2	44.64	52.59	61.24	57.51	0.62	6.65	44.7	52.76	61.8	57.3	0.68	6.66	69.2089	70.3728	72.0625	66.801	70.5225	73.6404	72.3144	71.4362
	Na2O	3.38	0.3	2.3	1.78	0.03	0.03	3.41712	0.280514	2.26606	1.78736	0.0758033	0.0081745	3.05504	2.90341	0.650062	3.85306	3.70285	2.256	3.44003	3.92045
	MgO	7.77	1.02	3	2.39	21.8	0.71	7.67123	0.997492	3.04476	2.42823	21.9094	0.648144	1.16452	0.981525	0.80257	0.750761	0.349068	0.767341	0.208123	0.219235
	Al2O3	13.83	15.69	14.16	20.5	0.1	0.68	14.1457	15.4423	14.3261	20.1401	0.138985	0.635358	13.4803	13.8833	13.779	15.5947	14.2841	12.2878	14.1291	14.2536
	P2O5	0.95	0.108	0.23	0.118	0.006	0.013	0.956708	0.0965879	0.23116	0.116597	0.00781382	0.0156599	0.25748	0.199657	0.168027	0.314399	0.2461	0.206679	0.315984	0.31376
	K2O	2.32	2.23	2.43	3.05	0.038	0.15	2.35059	2.19079	2.44142	3.05063	0.0710088	0.133359	5.12046	6.48074	7.32323	5.11764	4.57459	4.87963	2.05232	2.29421
	CaO	8.81	7.54	3.87	0.74	30.02	51.1	8.79237	7.66668	3.81925	0.735275	30.6955	50.2553	3.91238	2.19077	0.451652	2.59165	2.01003	2.19881	3.23771	3.28752
	TiO2	2.36	0.89	0.77	0.998	0.015	0.039	2.4036	0.891884	0.753069	1.00023	0.0128478	0.0351059	0.61853	0.480487	0.432475	0.591262	0.600446	0.39559	0.59839	0.650083
	MnO	0.17	0.107	0.13	0.284	0.01	0.003	0.181366	0.105641	0.122651	0.286904	0.00885698	0.00346017	0.0486826	0.0378493	0.0358514	0.0558186	0.0310471	0.0247268	0.0209807	0.0114697
	Fe2O3T	13.4	5.91	5.88	9	0.04	0.21	13.3804	5.93109	5.93109	8.9047	0.217073	0.212149	2.7477	2.20623	2.32646	3.05375	2.11374	2.61389	1.66037	1.51515
	LOI													0.290775	0.152033	1.84168	1.11724	1.5991	0.607741	1.95994	2.00473

## Sheet: Trace elements
	Sample	OU-6	BCR-1	GSD-11	GSD-12	OU-6	BCR-1	GSD-11	GSD-12	7ZK50-1184	7ZK50-1209	7ZK52-1225	11ZK52-1095	11ZK52-1174	11ZK54-964	11ZK55-993	11ZK55-999
	Comments	Reference values				Test values				Whole-rock samples
	Li	92.65	12.9	70.6	39	97.8	13.2	68.6	37.3	10.4	16.7	29.8	17.8	13.8	39.1	4.65	6.92
	Be	2.66	1.6	26	8.2	2.24	1.47	26.6	8.01	5.95	4.01	6.33	4.45	3.38	3.92	5.01	4.75
	Sc	22.1	32.6	7.4	5.1	22.5	30.9	8.09	5.30	8.47	9.64	7.54	9.51	7.72	7.44	6.38	8.10
	V	129.35	407	46.8	46.6	123	436	46.3	46.6	41.7	34.2	24.2	38.4	31.7	29.6	34.4	43.6
	Cr	70.78	16	40	35	68.1	14.4	40.8	35.7	19.9	14.2	12.0	12.3	5.50	14.1	21.3	23.1
	Co	29.11	37	8.5	8.8	29.7	38.1	8.42	8.48	8.48	5.03	3.18	6.06	3.29	7.09	3.43	3.16
	Ni	39.83	13	14.4	12.8	40.8	13.2	14.3	12.6	10.9	7.94	4.26	7.41	2.70	9.34	7.29	7.94
	Cu	39.62	19	78.6	1230	40.6	20.2	69.8	1290	261	67.6	21.2	16.5	11.9	198	16.1	121
	Zn	111.18	129.5	373	498	123	135	360	451	39.1	35.0	46.7	45.8	35.7	32.6	175	126
	As	13	0.65	188	115	15.5	1.54	194	112	1.35	1.51	4010	6.58	5.76	2.26	2.27	1.97
	Rb	120.2	47.2	408	270	113	47.4	433	286	237	287	655	155	111	248	55.3	58.8
	Sr	130.89	330	29	24.4	131	334	29.3	23.8	299	388	131	680	715	261	333	425
	Y	27.35	38	42.7	29.3	27.2	35.3	43.7	31.1	19.1	15.3	11.6	17.5	13.6	10.6	14.5	17.0
	Zr	174.15	190	153	234	168	180	168	234	284	239	247	337	336	198	299	272
	Nb	14.79	14	25	15.4	15.1	12.9	26.9	15.3	43.3	35.6	29.5	50.2	36.6	25.0	42.3	43.9
	Cs	8.02	0.96	17.4	7.9	8.25	1.00	17.0	7.54	8.90	7.60	26.3	3.93	17.3	12.2	2.46	3.36
	Ba	477.24	681	260	206	495	701	250	201	513	931	952	1140	1370	568	290	397
	La	33	24.9	30	32.7	34.5	26.7	27.6	31.9	67.1	57.6	59.7	100	86.1	61.0	62.0	70.4
	Ce	74.42	53.7	58	61	76.5	53.9	55.7	61.6	147	117	127	207	176	95.5	113	145
	Pr	7.8	6.8	7.4	6.9	8.14	7.01	6.75	7.07	13.9	12.1	12.8	18.9	16.5	10.3	12.4	14.0
	Nd	29.01	28.8	27	25.6	30.8	29.3	25.5	25.3	44.5	39.2	41.5	61.0	53.8	32.2	39.5	45.6
	Sm	5.92	6.59	6.2	5	6.04	6.67	5.97	5.04	6.77	5.99	6.22	8.64	7.88	4.62	6.12	7.08
	Eu	1.36	1.95	0.6	0.61	1.41	2.00	0.598	0.576	1.22	1.51	1.19	2.14	2.23	1.05	1.13	1.35
	Gd	5.27	6.68	5.9	4.4	5.52	6.29	5.67	4.67	6.31	5.43	5.46	7.97	7.10	4.39	5.62	6.58
	Tb	0.85	1.05	1.13	0.82	0.886	1.08	1.12	0.777	0.757	0.658	0.617	0.867	0.772	0.489	0.658	0.764
	Dy	4.99	6.34	7.2	4.8	4.99	6.39	7.18	4.78	3.35	2.86	2.40	3.46	2.92	2.06	2.82	3.22
	Ho	1.01	1.26	1.4	0.94	0.963	1.23	1.45	0.976	0.592	0.490	0.416	0.582	0.467	0.356	0.480	0.570
	Er	2.98	3.63	4.6	3.1	2.97	3.67	4.48	3.16	1.83	1.56	1.39	1.91	1.45	1.12	1.53	1.72
	Tm	0.44	0.56	0.74	0.53	0.465	0.522	0.736	0.543	0.250	0.197	0.167	0.232	0.162	0.140	0.186	0.218
	Yb	3	3.38	5.1	3.7	3.01	3.38	5.01	3.76	1.68	1.31	1.12	1.53	1.06	0.967	1.30	1.42
	Lu	0.45	0.51	0.78	0.58	0.474	0.510	0.755	0.570	0.251	0.181	0.161	0.219	0.145	0.138	0.192	0.202
	Hf	4.7	4.95	5.4	8.3	4.69	4.89	5.51	8.25	7.19	6.02	5.80	8.10	8.24	4.96	7.52	6.91
	Ta	1.06	0.81	5.7	3.2	1.46	1.10	5.64	3.23	3.75	2.74	2.19	3.47	2.47	1.82	3.05	3.12
	Pb	28.22	13.6	636	285	29.2	13.9	611	282	14.6	21.0	21.3	28.0	21.5	18.2	24.1	22.6
	Th	11.51	5.98	23.3	21.4	11.5	6.06	23.0	21.5	31.5	30.5	31.4	36.7	34.5	27.4	39.2	39.3
	U	1.96	1.75	9.1	7.8	1.95	1.69	9.24	8.01	13.4	9.55	10.4	6.77	3.80	8.60	20.6	15.7

## Sheet: Data summary
	Sample	7ZK50-1184	7ZK50-1209	7ZK52-1225	11ZK52-1095	11ZK52-1174	11ZK54-964	11ZK55-993	11ZK55-999
	Rock type	Granite porphyry (This study)
	SiO2	69.21	70.37	72.06	66.8	70.52	73.64	72.31	71.44
	Al2O3	13.48	13.88	13.78	15.59	14.28	12.29	14.13	14.25
	Fe2O3T	2.75	2.21	2.33	3.05	2.11	2.61	1.66	1.52
	MgO	1.16	0.98	0.8	0.75	0.35	0.77	0.21	0.22
	CaO	3.91	2.19	0.45	2.59	2.01	2.2	3.24	3.29
	Na2O	3.06	2.9	0.65	3.85	3.7	2.26	3.44	3.92
	K2O	5.12	6.48	7.32	5.12	4.57	4.88	2.05	2.29
	P2O5	0.26	0.2	0.17	0.31	0.25	0.21	0.32	0.31
	TiO2	0.62	0.48	0.43	0.59	0.6	0.4	0.6	0.65
	MnO	0.05	0.04	0.04	0.06	0.03	0.02	0.02	0.01
	LOI	0.29	0.15	1.84	1.12	1.6	0.61	1.96	2
	Total	99.9	99.89	99.87	99.84	100.03	99.88	99.94	99.91
	V	41.7	34.2	24.2	38.4	31.7	29.6	34.4	43.6
	Cr	19.9	14.2	12	12.3	5.5	14.1	21.3	23.1
	Co	8.48	5.03	3.18	6.06	3.29	7.09	3.43	3.16
	Ni	10.9	7.94	4.26	7.41	2.7	9.34	7.29	7.94
	Rb	237	287	655	155	111	248	55.3	58.8
	Sr	299	388	131	680	715	261	333	425
	Y	19.1	15.3	11.6	17.5	13.6	10.6	14.5	17
	Zr	284	239	247	337	336	198	299	272
	Nb	43.3	35.6	29.5	50.2	36.6	25	42.3	43.9
	Ba	513	931	952	1140	1370	568	290	397
	La	67.1	57.6	59.7	100	86.1	61	62	70.4
	Ce	147	117	127	207	176	95.5	113	145
	Pr	13.9	12.1	12.8	18.9	16.5	10.3	12.4	14
	Nd	44.5	39.2	41.5	61	53.8	32.2	39.5	45.6
	Sm	6.77	5.99	6.22	8.64	7.88	4.62	6.12	7.08
	Eu	1.22	1.51	1.19	2.14	2.23	1.05	1.13	1.35
	Gd	6.31	5.43	5.46	7.97	7.1	4.39	5.62	6.58
	Tb	0.76	0.66	0.62	0.87	0.77	0.49	0.66	0.76
	Dy	3.35	2.86	2.4	3.46	2.92	2.06	2.82	3.22
	Ho	0.59	0.49	0.42	0.58	0.47	0.36	0.48	0.57
	Er	1.83	1.56	1.39	1.91	1.45	1.12	1.53	1.72
	Tm	0.25	0.2	0.17	0.23	0.16	0.14	0.19	0.22
	Yb	1.68	1.31	1.12	1.53	1.06	0.97	1.3	1.42
	Lu	0.25	0.18	0.16	0.22	0.15	0.14	0.19	0.2
	Hf	7.19	6.02	5.8	8.1	8.24	4.96	7.52	6.91
	Ta	3.75	2.74	2.19	3.47	2.47	1.82	3.05	3.12
	Pb	14.6	21	21.3	28	21.5	18.2	24.1	22.6
	Th	31.5	30.5	31.4	36.7	34.5	27.4	39.2	39.3
	U	13.4	9.55	10.4	6.77	3.8	8.6	20.6	15.7
