# Supplementary material for: Magmatic Processes of Granitoids in the Hongniu-Hongshan Porphyry-Skarn Copper Deposit, Southern Yidun Terrane, China: Evidence from Mineral Geochemistry
Source: MDPI journal article supplement (doi:10.3390/min12121559), 2022-12-02
Supplement: s1 [file s1 › Table S2 EPMA data.xlsx]

## Sheet: Plagioclase
Table S2.1. Major element compositions of PL1 plagioclase crystal (EPM) and physicochemical conditions of crystallization																			(preferred)
Samples No.	comments	Na2O	K2O	CaO	SiO2	Al2O3	FeO	MgO	MnO	TiO2	Cr2O3	Total	An mol%	Ab mol%	Or mol%	KD(An-Ab)pl-liq	P2008-Eq23-T(°C)	SEE of EQ23 (°C)	P2008-Eq24a-T(°C)	SEE of EQ24a (°C)	P2008-Eq26-T(°C)	SEE of EQ26 (°C)	Melt in equilibrium	DSr	DTi
PL1-EPM-1	cores	5.71	0.28	9.42	55.378	27.063	0.403	0.021	0	0.07	0.377	98.722	46.9	51.44	1.66	0.119523	877.682	±43	889.891	±36	888.534	±37	11ZK55-999 (this study)	4.37873	0.043354
PL1-EPM-2		5.445	0.334	9.964	55.774	27.336	0.209	0.015	0.011	0	0.144	99.232	49.29	48.74	1.97	0.107754	885.478	±43	897.427	±36	892.308	±37		4.06198	0.040845
PL1-EPM-3		5.522	0.453	9.697	55.318	27.045	0.265	0	0.005	0.022	0.419	98.746	47.94	49.4	2.67	0.112286	886.388	±43	898.644	±36	893.593	±37		4.20897	0.0428689
PL1-EPM-4		5.82	0.326	9.465	55.603	26.808	0.222	0.026	0.038	0.017	0.34	98.665	46.43	51.66	1.9	0.121247	877.981	±43	890.29	±36	888.959	±37		4.43366	0.0440916
PL1-EPM-5		5.817	0.313	9.068	56.048	26.896	0.169	0.016	0	0.04	0.187	98.554	45.42	52.72	1.87	0.12649	874.43	±43	886.961	±36	887.08	±37		4.57892	0.0452113
PL1-EPM-6		6.311	0.34	8.6	57.215	26.113	0.184	0.006	0.013	0	0.129	98.911	42.11	55.91	1.98	0.1447	864.271	±43	877.568	±36	881.898	±37		5.08488	0.0493297
PL1-EPM-7		5.824	0.307	8.4	56.533	25.768	0.416	0.054	0.013	0.035	0.626	97.976	43.51	54.59	1.89	0.136713	870.469	±43	883.09	±36	885.629	±37		4.85309	0.04773
PL1-EPM-8		6.013	0.341	9.131	57.036	26.84	0.182	0.009	0.012	0	0.075	99.639	44.72	53.29	1.99	0.12985	874.306	±43	886.806	±36	887.504	±37		4.66949	0.0462714
PL1-EPM-9		6.37	0.477	8.305	56.945	26.866	0.257	0.094	0	0	0.091	99.405	40.71	56.5	2.78	0.15124	865.626	±43	879.383	±36	883.582	±37		5.27367	0.0519746
PL1-EPM-10		6.286	0.373	8.276	57.204	25.933	0.212	0.017	0.016	0.035	0.208	98.56	41.18	56.61	2.21	0.149769	861.306	±43	874.958	±36	880.041	±37		5.23824	0.0505698
PL1-EPM-11		5.94	0.353	8.813	57.004	26.725	0.189	0.005	0.015	0.02	0.061	99.125	44.1	53.79	2.1	0.132902	871.397	±43	884.308	±36	885.629	±37		4.76635	0.0469383
PL1-EPM-12		6.062	0.287	8.795	57.182	26.523	0.186	0.008	0.014	0	0.036	99.093	43.74	54.56	1.7	0.135909	867.207	±43	880.097	±36	882.918	±37		4.84191	0.0469869
PL1-EPM-13		6.248	0.383	8.378	57.545	26.302	0.222	0	0.003	0.026	0.193	99.3	41.6	56.14	2.26	0.147051	861.801	±43	875.614	±36	880.041	±37		5.1722	0.0499371
PL1-EPM-14		6.021	0.323	8.832	57.276	26.563	0.151	0.011	0.013	0	0.102	99.292	43.91	54.17	1.91	0.134424	867.737	±43	880.788	±36	882.918	±37		4.8145	0.0468026
Average		5.95636	0.349286	8.93886	56.5758	26.6272	0.233357	0.0201429	0.0109286	0.0189286	0.213429	98.9443	44.3971	53.5371	2.06357	0.132133	871.863	±43	884.702	±36	885.76	±37		4.74118	0.0466365
1σ		0.277203	0.054894	0.520747	0.756787	0.438257	0.078017	0.0243277	0.00946772	0.020324	0.162487	0.421332	2.48688	2.42051	0.313565	0.0130944	7.70094		7.17132		4.03741			0.365001	0.00305549
Max		6.37	0.477	9.964	57.545	27.336	0.416	0.094	0.038	0.07	0.626	99.639	49.29	56.61	2.78	0.15124	886.388	±43	898.644	±36	893.593	±37		5.27367	0.0519746
Min		5.445	0.28	8.276	55.318	25.768	0.151	0	0	0	0.036	97.976	40.71	48.74	1.66	0.107754	861.306	±43	874.958	±36	880.041	±37		4.06198	0.040845
PL1-EPM-15	mantle	8.191	0.368	4.989	62.018	23.318	0.212	0	0.012	0	0.073	99.181	24.64	73.2	2.16	0.0509575	819.447	±43	779.914	±36	859.7	±37	HS-800 (Huang et al. 2012)	10.0739	0.0713805
PL1-EPM-16		8.059	0.652	5.584	61.359	24.107	0.202	0	0.007	0.025	0	99.995	26.66	69.63	3.71	0.0447941
PL1-EPM-17		7.894	0.563	5.727	61.235	24.238	0.195	0	0.009	0.004	0	99.865	27.69	69.07	3.24	0.0427814
PL1-EPM-18		8.054	0.733	5.542	61.5	23.925	0.215	0.017	0	0.025	0.021	100.032	26.4	69.44	4.16	0.0451056	843.776	±43	801.113	±36	875.264	±37		9.13156	0.0705324
PL1-EPM-19		7.957	0.645	5.477	61.499	24.006	0.182	0	0.003	0	0.006	99.775	26.53	69.75	3.72	0.0450912	840.33	±43	798.163	±36	873.014	±37		9.15161	0.0696878
PL1-EPM-20		8.016	0.82	4.579	62.337	23.523	0.186	0	0.002	0.006	0	99.469	22.83	72.31	4.87	0.0543341	823.695	±43	784.801	±36	859.7	±37		10.53	0.0772547
PL1-EPM-21		8.133	0.713	4.699	61.565	23.253	0.17	0	0.002	0.039	0.003	98.577	23.19	72.62	4.19	0.0537193	822.523	±43	783.447	±36	859.7	±37		10.4469	0.0759827
PL1-EPM-22		8.037	0.7	5.074	61.956	23.675	0.208	0.012	0.002	0.004	0.009	99.677	24.81	71.11	4.08	0.0491619	834.135	±43	792.955	±36	868.541	±37		9.74318	0.0732651
Average		8.04263	0.64925	5.20887	61.6836	23.7556	0.19625	0.003625	0.004625	0.012875	0.014	99.5714	25.3438	70.8912	3.76625	0.0482431	830.651	±43	790.065	±36	865.987	±37		9.84619	0.0730172
1σ		0.0871363	0.127169	0.405476	0.353804	0.345016	0.0148724	0.0064019	0.00393502	0.0137517	0.0232594	0.458547	1.63928	1.52872	0.751131	0.0041353	9.29228		7.85875		6.58965			0.560359	0.00279136
Max		8.191	0.82	5.727	62.337	24.238	0.215	0.017	0.012	0.039	0.073	100.032	27.69	73.2	4.87	0.0543341	843.776	±43	801.113	±36	875.264	±37		10.53	0.0772547
Min		7.894	0.368	4.579	61.235	23.253	0.17	0	0	0	0	98.577	22.83	69.07	2.16	0.0427814	819.447	±43	779.914	±36	859.7	±37		9.13156	0.0696878
PL1-EPM-23	resorpion	7.366	0.534	6.61	59.651	24.827	0.21	0.008	0	0.024	0.059	99.289	32.13	64.78	3.09	0.144395	842.465	±43	839.009	±36	866.871	±37	11ZK52-1174 (this study)	7.177	0.0631183
PL1-EPM-24		7.139	0.507	6.506	59.974	24.669	0.169	0	0.006	0.082	0.015	99.067	32.48	64.5	3.01	0.142182	842.354	±43	838.859	±36	866.461	±37		7.10671	0.0623231
PL1-EPM-25		7.165	0.513	6.629	60.132	24.567	0.166	0	0.002	0.009	0.014	99.197	32.81	64.17	3.02	0.140052	845.389	±43	841.526	±36	868.685	±37		7.0065	0.0620164
PL1-EPM-26		7.244	0.477	6.582	59.974	24.722	0.182	0	0.025	0.035	0.009	99.25	32.49	64.71	2.8	0.142607	841.949	±43	838.351	±36	866.461	±37		7.11103	0.0622221
PL1-EPM-27		7.278	0.593	6.222	60.194	24.245	0.174	0	0.008	0.002	0.005	98.721	30.96	65.53	3.51	0.151566	837.733	±43	835.386	±36	863.666	±37		7.47246	0.0651859
PL1-EPM-28		7.279	0.532	6.458	60.344	24.72	0.161	0	0	0	0.042	99.536	31.87	65	3.13	0.146048	839.907	±43	836.962	±36	865.062	±37		7.25754	0.0633751
PL1-EPM-29		7.048	0.51	6.687	59.927	24.941	0.184	0.001	0	0.022	0.052	99.372	33.35	63.62	3.03	0.13657	845.312	±43	841.4	±36	867.864	±37		6.89983	0.0608336
PL1-EPM-30		6.938	0.44	7.13	58.938	25.001	0.192	0.007	0.011	0.015	0.043	98.715	35.28	62.13	2.59	0.126086	853.304	±43	847.893	±36	872.92	±37		6.45601	0.0578037
PL1-EPM-31		6.814	0.455	7.449	58.548	25.442	0.134	0.012	0	0	0.009	98.863	36.66	60.68	2.67	0.118529	859.707	±43	853.545	±36	876.594	±37		6.14915	0.0558947
PL1-EPM-32		7.177	0.421	7.163	59.649	25.16	0.177	0.01	0.005	0.007	0	99.769	34.69	62.89	2.43	0.129828	849.967	±43	844.887	±36	871.092	±37		6.59938	0.058558
PL1-EPM-33		6.615	0.381	7.931	58.032	25.843	0.272	0	0.027	0.006	0.033	99.14	38.96	58.81	2.23	0.108074	865.178	±43	857.952	±36	879.035	±37		5.71975	0.0522067
PL1-EPM-34		7.212	0.453	6.602	59.891	24.665	0.194	0	0.015	0.011	0.046	99.089	32.7	64.63	2.67	0.141547	841.583	±43	837.875	±36	866.052	±37		7.07394	0.0616906
PL1-EPM-35		7.196	0.567	6.475	60.057	24.77	0.24	0	0	0.011	0.01	99.326	32.1	64.55	3.35	0.144003	843.25	±43	840.02	±36	867.28	±37		7.17038	0.0633435
PL1-EPM-36		6.914	0.424	7.429	58.465	25.093	0.192	0.007	0	0	0.129	98.653	36.34	61.19	2.47	0.120592	856.244	±43	850.384	±36	874.339	±37		6.23746	0.0560637
PL1-EPM-37		7.256	0.403	6.644	59.484	24.82	0.298	0.007	0.004	0.013	0.185	99.114	32.8	64.83	2.37	0.14151	840.79	±43	836.859	±36	865.643	±37		7.06614	0.0613171
Average		7.1094	0.480667	6.83447	59.5507	24.899	0.196333	0.00346667	0.00686667	0.0158	0.0434	99.1401	33.708	63.468	2.82467	0.135573	847.009	±43	842.727	±36	869.202	±37		6.83355	0.0603969
1σ		0.1987	0.0599885	0.45834	0.69009	0.368867	0.0418165	0.00428745	0.00870913	0.020117	0.0492095	0.30079	2.13593	1.87267	0.362342	0.0118143	7.81947		6.5443		4.40974			0.47461	0.00343026
Max		7.366	0.593	7.931	60.344	25.843	0.298	0.012	0.027	0.082	0.185	99.769	38.96	65.53	3.51	0.151566	865.178	±43	857.952	±36	879.035	±37		7.47246	0.0651859
Min		6.615	0.381	6.222	58.032	24.245	0.134	0	0	0	0	98.653	30.96	58.81	2.23	0.108074	837.733	±43	835.386	±36	863.666	±37		5.71975	0.0522067
PL1-EPM-38	rim	8.436	0.891	4.378	62.858	23.011	0.194	0	0.012	0.002	0.017	99.799	21.15	73.73	5.12	0.0598062	812.787	±43	775.997	±36	850.994	±37	HS-800 (Huang et al. 2012)	11.307	0.0804972
PL1-EPM-39		8.451	0.82	4.465	62.962	23.179	0.186	0	0.014	0	0.015	100.092	21.53	73.76	4.71	0.0587451	812.007	±43	775.102	±36	850.994	±37		11.1992	0.0791938
PL1-EPM-40		7.898	0.644	5.156	61.757	23.898	0.169	0	0.006	0	0	99.528	25.51	70.7	3.79	0.0475433	834.103	±43	792.954	±36	868.541	±37		9.53986	0.0714083
PL1-EPM-41		8.228	0.715	5.037	62.849	23.564	0.202	0.007	0.005	0	0	100.607	24.24	71.66	4.1	0.0506999	828.348	±43	788.249	±36	864.104	±37		10.0133	0.0739576
PL1-EPM-42		8.457	0.302	4.497	62.854	23.44	0.102	0.011	0.027	0	0.001	99.691	22.31	75.91	1.78	0.0583685	801.403	±43	764.683	±36	846.692	±37		11.2005	0.0749675
Average		8.294	0.6744	4.7066	62.656	23.4184	0.1706	0.0036	0.0128	0.0004	0.0066	99.9434	22.948	73.152	3.9	0.0550326	817.73	±43	779.397	±36	856.265	±37		10.652	0.0760049
1σ		0.215664	0.204631	0.322926	0.451463	0.308211	0.0359978	0.00458694	0.00788416	0.0008	0.00770973	0.379358	1.66635	1.81927	1.15681	0.00495095	11.8708		10.0862		8.47774			0.731327	0.00336887
Max		8.457	0.891	5.156	62.962	23.898	0.202	0.011	0.027	0.002	0.017	100.607	25.51	75.91	5.12	0.0598062	834.103	±43	792.954	±36	868.541	±37		11.307	0.0804972
Min		7.898	0.302	4.378	61.757	23.011	0.102	0	0.005	0	0	99.528	21.15	70.7	1.78	0.0475433	801.403	±43	764.683	±36	846.692	±37		9.53986	0.0714083
The plagioclase-liquid equilibrium temperature, pressure and water conditions of plagioclase are estimated using the equation 23-24a-26 of Putirka (2008).
The partition coefficients of Sr (DSr) between plagioclase and melt are calculated from Blundy and Wood (1991).
The partition coefficients of Ti (DTi) between plagioclase and melt are calculated from Nielsen et al (2017).
Table S2.2. Major element compositions of PL2 plagioclase crystal (EPM) andphysicochemical conditions of crystallization
Samples No.	comments	Na2O	K2O	CaO	SiO2	Al2O3	FeO	MgO	MnO	TiO2	Cr2O3	Total	An mol%	Ab mol%	Or mol%	KD(An-Ab)pl-liq	Eq23-T(°C)	SEE of EQ23 (°C)	Eq24a-T (°C)	SEE of EQ24a (°C)	Eq26-T(°C)	SEE of EQ26 (°C)	Melt in equilibrium	DSr	DTi
PL2-EPM-1		8.379	0.679	4.781	62.091	23.438	0.205	0.012	0.045	0	0	99.63	23.04	73.07	3.9	0.0543949	797.437	±43	780.522	±36	857.511	±37	HS-800 (Huang et al. 2012)	10.5633	0.075862
PL2-EPM-2		8.47	0.69	4.79	62.276	23.515	0.211	0.001	0.006	0.057	0.025	100.041	22.88	73.2	3.92	0.0548824	797.574	±43	780.432	±36	857.511	±37		10.6171	0.076297
PL2-EPM-3		8.281	0.627	4.641	62.534	23.369	0.184	0.006	0	0	0.002	99.644	22.78	73.55	3.66	0.0553804	794.419	±43	777.694	±36	855.33	±37		10.7154	0.0760696
PL2-EPM-4		8.275	0.728	4.699	62.399	23.259	0.172	0.002	0.007	0	0.033	99.574	22.88	72.9	4.22	0.0546572	798.296	±43	781.171	±36	857.511	±37		10.5995	0.0764348
PL2-EPM-5		8.363	0.683	4.788	62.503	23.539	0.184	0	0.029	0	0	100.089	23.09	72.99	3.92	0.0542117	797.479	±43	780.639	±36	857.511	±37		10.5445	0.0757431
PL2-EPM-6		8.576	0.715	4.825	62.403	23.427	0.19	0.018	0	0.035	0.001	100.19	22.76	73.22	4.02	0.0551661	795.282	±43	778.555	±36	855.33	±37		10.7011	0.0762869
PL2-EPM-7		8.283	0.678	4.948	61.993	23.542	0.188	0	0	0	0	99.632	23.85	72.26	3.89	0.0519569	802.278	±43	785.35	±36	861.897	±37		10.1966	0.0744973
PL2-EPM-8		8.208	0.743	4.828	61.957	23.616	0.181	0	0.003	0	0.005	99.541	23.48	72.22	4.3	0.0527661	803.417	±43	785.991	±36	861.897	±37		10.2972	0.0756406
PL2-EPM-9		8.147	0.649	5.167	61.932	23.91	0.203	0	0	0	0.003	100.011	24.98	71.28	3.74	0.0489378	806.756	±43	790.199	±36	866.318	±37		9.75064	0.0723171
PL2-EPM-10		7.719	0.545	6.174	60.483	24.694	0.194	0.005	0.001	0.02	0	99.835	29.7	67.18	3.12	0.139267	836.035	±43	822.728	±36	866.529	±37	HS12-05 (Wang et al. 2014)	7.93583	0.0660658
PL2-EPM-11		7.91	0.513	6.106	60.538	24.752	0.17	0.007	0	0.006	0.026	100.028	29.03	68.06	2.9	0.144302	829.978	±43	817.477	±36	862.513	±37		8.1751	0.0667922
PL2-EPM-12		8.056	0.575	5.774	61.017	24.388	0.177	0.02	0.017	0.008	0	100.032	27.45	69.3	3.25	0.155416
PL2-EPM-13		8.306	0.621	5.108	61.95	23.74	0.163	0.009	0	0	0	99.897	24.47	71.99	3.54	0.0504692	801.233	±43	785.113	±36	861.897	±37	HS-800 (Huang et al. 2012)	10.0117	0.0727681
PL2-EPM-14		8.323	0.557	5.022	62.022	23.733	0.183	0.005	0.006	0	0.005	99.856	24.21	72.6	3.2	0.0514385	800.474	±43	783.986	±36	861.897	±37		10.1159	0.0732662
PL2-EPM-15		8.482	0.673	4.796	62.332	23.444	0.209	0	0.006	0.006	0.004	99.952	22.9	73.28	3.83	0.0548914	794.761	±43	778.209	±36	855.33	±37		10.6638	0.0758265
PL2-EPM-16		7.931	0.536	5.725	61.262	24.402	0.149	0	0	0.026	0.007	100.038	27.64	69.28	3.08	0.154314	824.996	±43	813.563	±36	859.737	±37	HS12-05 (Wang et al. 2014)	8.58268	0.0695359
PL2-EPM-17		8.209	0.579	5.337	61.653	23.908	0.185	0	0.013	0.017	0	99.901	25.56	71.14	3.3	0.0477395	805.571	±43	789.743	±36	866.318	±37	HS-800 (Huang et al. 2012)	9.59061	0.0707108
PL2-EPM-18		8.338	0.687	4.961	61.901	23.619	0.168	0.018	0.002	0	0.015	99.709	23.77	72.31	3.92	0.0521648	802.375	±43	785.341	±36	861.897	±37		10.2216	0.0747161
PL2-EPM-19		8.543	0.683	4.666	62.331	23.372	0.197	0	0	0.017	0.007	99.816	22.28	73.83	3.88	0.0568265	790.08	±43	773.792	±36	850.994	±37		10.9776	0.0767627
PL2-EPM-20		8.516	0.701	4.478	62.528	23.184	0.222	0.007	0	0	0	99.636	21.61	74.36	4.03	0.0590251	788.238	±43	771.549	±36	848.839	±37		11.2639	0.078279
PL2-EPM-21		8.331	0.606	4.84	62.192	23.751	0.166	0	0.011	0	0.006	99.903	23.45	73.05	3.5	0.0534241	796.305	±43	779.94	±36	857.511	±37		10.4457	0.0746096
PL2-EPM-22		8.529	0.612	4.644	62.331	23.422	0.184	0	0.004	0	0	99.726	22.32	74.18	3.5	0.0570021	789.138	±43	772.877	±36	850.994	±37		10.9872	0.0764759
PL2-EPM-23		8.547	0.532	4.734	62.374	23.551	0.163	0.007	0.017	0	0	99.925	22.72	74.24	3.04	0.0560364	787.844	±43	772.118	±36	850.994	±37		10.8719	0.0751998
PL2-EPM-24		8.438	0.719	4.946	62.028	23.593	0.153	0.011	0	0	0	99.888	23.47	72.46	4.06	0.0529506	800.246	±43	783.375	±36	859.7	±37		10.36	0.0751863
PL2-EPM-25		8.389	0.718	4.739	62.017	23.461	0.129	0	0.008	0	0	99.461	22.81	73.07	4.12	0.0549425	795.501	±43	778.845	±36	855.33	±37		10.6778	0.0761994
PL2-EPM-26		8.342	0.739	4.852	62.327	23.604	0.172	0	0	0	0.029	100.065	23.3	72.48	4.22	0.0533623	798.13	±43	781.591	±36	857.511	±37		10.455	0.0753311
PL2-EPM-27		8.36	0.684	4.737	62.248	23.549	0.202	0.007	0	0	0	99.787	22.91	73.15	3.94	0.0547757	795.03	±43	778.498	±36	855.33	±37		10.6536	0.0758522
PL2-EPM-28		8.378	0.769	4.733	62.047	23.385	0.147	0.004	0.009	0.022	0	99.494	22.74	72.86	4.4	0.05494	796.222	±43	779.488	±36	855.33	±37		10.6852	0.0765179
PL2-EPM-29		8.449	0.749	4.614	62.375	23.319	0.186	0.007	0.008	0	0	99.707	22.19	73.52	4.29	0.0568346	793.657	±43	776.691	±36	853.158	±37		10.9353	0.0775684
PL2-EPM-30		8.348	0.668	4.486	62.444	23.076	0.555	0.011	0.023	0	0.028	99.639	22	74.1	3.9	0.0577575	790.26	±43	773.571	±36	850.994	±37		11.078	0.0775277
PL2-EPM-31		8.345	0.813	4.646	62.362	23.393	0.2	0.005	0.033	0	0.003	99.8	22.43	72.9	4.67	0.0557484	797.035	±43	779.866	±36	855.33	±37		10.7775	0.0774751
PL2-EPM-32		8.486	0.705	4.7	62.714	23.276	0.19	0.009	0	0	0.021	100.101	22.49	73.49	4.02	0.056039	795.407	±43	778.296	±36	855.33	±37		10.7961	0.0770078
PL2-EPM-33		8.399	0.632	4.724	62.59	23.599	0.157	0	0.026	0	0.031	100.158	22.85	73.51	3.64	0.0551827	794.33	±43	777.699	±36	855.33	±37		10.6924	0.0758727
PL2-EPM-34		8.321	0.693	4.788	62.084	23.65	0.169	0.007	0	0.026	0.015	99.753	23.16	72.84	3.99	0.0539394	797.619	±43	780.883	±36	857.511	±37		10.5163	0.0755918
PL2-EPM-35	resorption	7.328	0.47	7.031	59.352	25.379	0.178	0	0.006	0.005	0	99.749	33.72	63.6	2.68	0.135048	844.692	±43	840.611	±36	867.454	±37	11ZK52-1174 (this study)	6.83594	0.0599297
PL2-EPM-36		8.291	0.613	5.244	61.571	23.919	0.159	0	0.019	0.017	0.006	99.839	25	71.52	3.48	0.0490715	806.13	±43	789.58	±36	866.318	±37	HS-800 (Huang et al. 2012)	9.75768	0.0721535
PL2-EPM-37		7.665	0.526	6.159	60.517	24.791	0.199	0	0	0.052	0	99.909	29.82	67.15	3.03	0.138629	835.667	±43	822.255	±36	866.12	±37	HS12-05 (Wang et al. 2014)	7.91504	0.0657062
PL2-EPM-38		7.956	0.589	5.669	61.404	24.148	0.173	0.016	0.022	0.031	0	100.008	27.3	69.33	3.38	0.156329
PL2-EPM-39		7.994	0.667	5.112	62.122	23.683	0.204	0.006	0	0	0	99.788	25.09	71.01	3.9	0.0485354	809.737	±43	792.763	±36	868.541	±37	HS-800 (Huang et al. 2012)	9.66527	0.0724826
PL2-EPM-40		8.27	0.67	4.785	62.509	23.664	0.228	0.004	0.014	0.026	0	100.17	23.29	72.83	3.88	0.0536425	797.304	±43	780.733	±36	857.511	±37		10.4782	0.0752006
PL2-EPM-41		8.5	0.721	4.503	62.752	23.141	0.2	0	0	0.014	0	99.831	21.71	74.15	4.14	0.0585871	790.992	±43	773.891	±36	850.994	±37		11.1687	0.0784329
PL2-EPM-42		8.414	0.674	4.635	62.504	23.221	0.231	0	0.018	0.007	0	99.704	22.43	73.69	3.88	0.0563427	792.555	±43	775.913	±36	853.158	±37		10.8745	0.076732
PL2-EPM-43		8.38	0.675	4.667	62.544	23.38	0.179	0.008	0	0	0	99.833	22.62	73.49	3.89	0.0557303	795.052	±43	778.11	±36	855.33	±37		10.7578	0.0766016
PL2-EPM-44		8.408	0.582	4.709	62.309	23.568	0.158	0.009	0.001	0.001	0	99.745	22.84	73.8	3.36	0.0554178	793.655	±43	776.996	±36	855.33	±37		10.7126	0.07577
PL2-EPM-45	resorption	7.397	0.422	6.62	59.833	24.851	0.38	0.023	0.02	0	0.014	99.56	32.28	65.27	2.45	0.144783	838.061	±43	834.584	±36	863.839	±37	11ZK52-1174 (this study)	7.20236	0.0620957
PL2-EPM-46		7.561	0.372	6.325	60.27	24.868	0.26	0	0.018	0	0	99.674	30.93	66.91	2.17	0.133159	836.449	±43	822.049	±36	866.702	±37	HS12-05 (Wang et al. 2014)	7.66451	0.0631212
PL2-EPM-47		7.636	0.362	6.049	60.661	24.472	0.398	0.005	0	0.013	0.009	99.605	29.8	68.08	2.12	0.140616	830.868	±43	817.427	±36	863.498	±37		7.99257	0.0649656
PL2-EPM-48		8.136	0.358	5.552	60.938	23.931	0.184	0.01	0.001	0	0	99.11	26.82	71.12	2.06	0.0454827	804.999	±43	790.126	±36	868.541	±37	HS-800 (Huang et al. 2012)	9.22491	0.067574
PL2-EPM-49		8.454	0.324	5.115	61.855	23.513	0.265	0.015	0.03	0.008	0.002	99.581	24.59	73.55	1.85	0.0512982	791.998	±43	777.05	±36	857.511	±37		10.1531	0.0710004
The plagioclase-liquid equilibrium temperature, pressure and water conditions of plagioclase are estimated using the equation 23-24a-26 of Putirka (2008).
The partition coefficients of Sr (DSr) between plagioclase and melt are calculated from Blundy and Wood (1991).
The partition coefficients of Ti (DTi) between plagioclase and melt are calculated from Nielsen et al (2017).

## Sheet: Amphibole
Table S2.3. Major element compositions of amphibole and physicochemical conditions of crystallization																Formula on the basis of 13 cations (Leake et al 1997)																									Formula on the base of 23 oxygens (Putirka, 2016)
Samples No.	comments	SiO2	TiO2	Al2O3	FeOt	MnO	MgO	CaO	Na2O	K2O	Cr2O3	F	Cl	Total (wt%)	Mg#	Si	Al (IV)	Ti	Sum (T site)	Al (VI)	Ti	Cr	Fe3+	Mg	Fe2+	Mn	Sum (C site)	Fe2+	Ca	Na	Sum (B site)	Na	K	sum (A site)	A□	Mg/(Mg+Fe2+)	R2010-T (°C)	R2010-ΔNNO	R2010-logfO2	P2016-T-Si (°C)	Si	Ti	Al	Cr	Fe	Mn	Mg	Ca	Na
Amp1-1-1	Mg-Hbl	45.869	1.144	6.863	16.688	0.631	12.459	10.941	1.836	0.87	0.075	0.778	0.132	97.928	57.0952	6.78064	1.19569	0.0236614	8	0	0.103513	0.00876569	0.82386	2.74565	1.2392	0.0790073	5	0	1.73288	0.267125	2	0.259097	0.164071	0.423168	0.576832	0.689022	811.87	1.08289	-12.5254	837.796	6.90426	0.129525	1.2175	0.00892578	2.10067	0.0804475	2.7957	1.76453	0.535819
Amp1-1-2	Mg-Hbl	45.402	1.084	6.994	16.332	0.619	12.695	10.964	1.884	0.886	0	0.825	0.101	97.416	58.0801	6.7402	1.22371	0.0360864	8	0	0.0849317	0	0.855934	2.80958	1.17172	0.077835	5	0	1.74392	0.256084	2	0.286196	0.1678	0.453996	0.546004	0.705694	825.356	1.19705	-12.1332	843.786	6.86796	0.123342	1.24691	0	2.06609	0.0793102	2.86282	1.77703	0.552562
Amp1-1-3	Mg-Hbl	45.746	1.001	6.263	16.189	0.644	13.22	10.872	1.758	0.817	0.031	0.654	0.117	97.011	59.2758	6.90713	1.09287	0	8	0.0216299	0.113658	0.00370066	1.00313	2.97568	0.799837	0.08236	5	0.241217	1.75878	-1.33227e-15	2	0.514645	0.157372	0.672017	0.327983	0.740821	854.197	1.18537	-11.5833	833.147	6.93244	0.114103	1.11859	0.00371434	2.05168	0.0826617	2.98657	1.76529	0.516534
Amp1-1-4	Mg-Hbl	45.434	1.36	7.133	16.102	0.589	12.688	11.129	1.889	0.851	0	0.75	0.082	97.672	58.4116	6.73149	1.24554	0.022974	8	0	0.128554	0	0.751694	2.80242	1.24341	0.0739148	5	0	1.76663	0.233373	2	0.30926	0.16085	0.47011	0.52989	0.692669	827.912	1.04991	-12.2273	847.859	6.84328	0.154082	1.26623	0	2.02824	0.0751421	2.84895	1.79603	0.551648
Amp1-2-1	Mg-Hbl	44.23	1.059	7.849	16.867	0.363	12.654	11.312	1.881	1.3	0.147	0.652	0.19	98.186	57.2142	6.55853	1.3717	0.069769	8	0	0.0483197	0.0172338	0.876795	2.79723	1.21483	0.0455913	5	0	1.79716	0.202836	2	0.337947	0.24592	0.583867	0.416133	0.697205	869.916	1.2143	-11.2397	873.82	6.68594	0.120412	1.39835	0.0175691	2.13226	0.0464769	2.85156	1.83214	0.551292
Amp1-2-2	Mg-Hbl	48.052	0.728	5.467	14.372	0.415	14.297	11.388	1.543	0.753	0.049	0.635	0.092	97.503	63.9397	7.03736	0.943631	0.0190049	8	0	0.0611727	0.00567372	0.662954	3.12143	1.09729	0.0514793	5	0	1.78692	0.213082	2	0.225054	0.140687	0.365741	0.634259	0.739901	778.12	1.70927	-12.636	798.86	7.14024	0.0813696	0.957431	0.00575684	1.78597	0.0522318	3.16705	1.8131	0.444544
Amp1-2-3	Mg-Hbl	47.242	0.735	5.406	14.546	0.39	14.29	11.497	1.481	0.726	0.044	0.714	0.111	96.856	63.6505	6.97902	0.941232	0.0797528	8	0	0.00190099	0.00513916	0.731795	3.14709	1.06528	0.0487996	5	0	1.81974	0.180262	2	0.243933	0.136824	0.380758	0.619242	0.747107	804.571	1.88017	-11.8946	806.852	7.09181	0.0829938	0.956449	0.00522238	1.82612	0.0495882	3.19793	1.84921	0.431053
Amp1-2-4	Mg-Hbl	46.248	0.927	6.805	14.799	0.419	13.288	11.523	1.614	1.005	0.165	0.611	0.142	97.257	61.5451	6.86045	1.13955	0	8	0.0501661	0.10341	0.0193516	0.546012	2.93853	1.28989	0.0526453	5	0	1.8314	0.168597	2	0.295606	0.19019	0.485795	0.514205	0.694948	811.186	1.24603	-12.3769	831.433	6.94283	0.104677	1.20401	0.0195846	1.85794	0.0532774	2.9738	1.85346	0.46978
Amp1-2-5	Mg-Hbl	45.003	1.067	7.791	16.91	0.366	12.095	11.436	1.619	1.164	0.11	0.585	0.166	98.029	56.042	6.6818	1.3182	0	8	0.0451264	0.119135	0.0129127	0.696916	2.67712	1.40276	0.0460277	5	0	1.81922	0.180782	2	0.285279	0.220478	0.505758	0.494242	0.656177	831.348	0.883689	-12.3157	857.549	6.78455	0.120997	1.3843	0.0131117	2.13196	0.0467354	2.71828	1.84726	0.473232
Amp1-2-6	Mg-Hbl	46.865	0.868	6.053	15.046	0.407	13.62	11.189	1.562	0.993	0.046	0.682	0.102	97.123	61.7372	6.92955	1.05483	0.0156176	8	0	0.0808984	0.00537759	0.707379	3.00223	1.15314	0.0509726	5	0	1.77258	0.227417	2	0.22038	0.187313	0.407693	0.592307	0.722494	792.825	1.50144	-12.5175	815.772	7.03775	0.098047	1.0713	0.00546172	1.88957	0.0517684	3.04909	1.80032	0.454792
Amp1-2-7	Mg-Hbl	47.694	0.929	5.531	15.009	0.404	13.854	11.408	1.512	0.771	0.033	0.585	0.11	97.569	62.1967	7.00712	0.957711	0.0351674	8	0	0.0674722	0.00383321	0.652244	3.03432	1.19185	0.050274	5	0	1.79574	0.204258	2	0.226439	0.144508	0.370947	0.629053	0.717983	785.45	1.57424	-12.6093	804.201	7.10787	0.104141	0.971486	0.00388845	1.87061	0.0509967	3.07794	1.82162	0.436893
Amp1-2-8	Mg-Hbl	47.32	0.867	5.668	15.022	0.375	13.962	11.477	1.707	0.795	0.031	0.668	0.095	97.685	62.3588	6.9611	0.982692	0.0562095	8	0	0.039703	0.00360552	0.645771	3.0619	1.20229	0.0467251	5	0	1.80892	0.191077	2	0.29579	0.149197	0.444987	0.555013	0.718049	802.391	1.62313	-12.1956	812.07	7.06018	0.0973015	0.996685	0.00365696	1.87437	0.0473901	3.10547	1.83473	0.493801
Amp1-2-9	Mg-Hbl	47.267	0.853	5.583	14.83	0.41	14.063	11.423	1.588	0.837	0.038	0.695	0.093	97.366	62.8287	6.96422	0.969475	0.0663066	8	0	0.0282053	0.00442661	0.691198	3.08889	1.13611	0.0511663	5	0	1.80324	0.196762	2	0.256876	0.157326	0.414202	0.585798	0.731099	803.348	1.72009	-12.0791	810.379	7.07043	0.0959768	0.984265	0.00449426	1.85517	0.0519465	3.13599	1.8308	0.460559
Amp1-2-10	Mg-Hbl	46.516	0.925	6.468	15.693	0.389	13.161	11.196	1.59	0.953	0.046	0.749	0.116	97.461	59.9174	6.87603	1.12397	0	8	0.00286501	0.102825	0.00537609	0.72827	2.90025	1.21171	0.0487047	5	0	1.7732	0.226803	2	0.228894	0.179717	0.408611	0.591389	0.70532	795.319	1.30711	-12.6542	824.209	6.98661	0.104505	1.14496	0.00546272	1.97118	0.0494879	2.94687	1.80177	0.463029
Amp1-2-11	Mg-Hbl	45.791	0.96	6.683	16.096	0.459	12.684	11.378	1.538	0.891	0.078	0.528	0.137	96.97	58.413	6.82589	1.1741	8.94214e-06	8	0	0.107606	0.00919278	0.701339	2.81868	1.30523	0.0579533	5	0	1.8172	0.182796	2	0.261712	0.169441	0.431153	0.568847	0.683498	804.842	1.15238	-12.604	833.296	6.93154	0.109308	1.19228	0.00933536	2.03762	0.0588501	2.86229	1.84539	0.451391
Amp1-2-12	Mg-Hbl	47.424	0.614	5.844	15.126	0.388	13.973	11.346	1.156	1.006	0.286	0.667	0.072	97.605	62.2152	6.94206	1.00822	0.0497256	8	0	0.0178642	0.0331001	0.86449	3.04923	0.987208	0.0481069	5	2.22045e-15	1.77947	0.220528	2	0.107562	0.187866	0.295428	0.704572	0.755426	793.19	1.8163	-12.1972	809.626	7.07499	0.068901	1.02753	0.033735	1.88716	0.049028	3.10761	1.81361	0.334374
Amp1-2-13	Mg-Hbl	47.069	0.893	6.025	14.551	0.374	13.927	11.386	1.605	0.914	0.013	0.62	0.112	97.203	63.0451	6.94554	1.04781	0.00664922	8	0	0.0924443	0.00151666	0.629924	3.06365	1.16572	0.0467443	5	0	1.80012	0.199883	2	0.259305	0.172059	0.431364	0.568636	0.724375	793.423	1.51864	-12.4878	815.08	7.04194	0.100494	1.06236	0.00153776	1.82057	0.047393	3.10616	1.82516	0.465564
Amp1-2-14	Mg-Hbl	47.275	0.796	5.755	14.228	0.38	13.96	11.498	1.395	0.842	0	0.648	0.094	96.577	63.6213	7.00866	0.991343	0	8	0.0142058	0.088744	0	0.586721	3.08531	1.1773	0.047717	5	0	1.82635	0.17365	2	0.22733	0.159249	0.386578	0.613422	0.723808	782.241	1.57061	-12.6808	805.636	7.09918	0.0899123	1.01854	0	1.7868	0.0483331	3.12515	1.85	0.406161
Amp1-2-15	Mg-Hbl	47.02	0.761	5.635	15.099	0.404	13.995	11.212	1.351	0.895	0.07	0.677	0.075	96.892	62.2942	6.93656	0.979738	0.0837021	8	0	0.0007225	0.00816456	0.870946	3.07783	0.991853	0.0504811	5	0	1.77216	0.227839	2	0.158582	0.16844	0.327022	0.672978	0.756283	804.639	1.86928	-11.9022	810.384	7.0704	0.0860747	0.998647	0.00832235	1.89874	0.051455	3.1372	1.80641	0.39388
Amp1-3-1	Mg-Hbl	46.782	0.956	5.718	15.228	0.549	13.316	10.876	1.75	0.759	0.038	0.534	0.133	96.384	60.9167	6.96471	1.00328	0.0320117	8	0	0.0750182	0.00447281	0.729866	2.95535	1.16607	0.0692281	5	0	1.73481	0.26519	2	0.239943	0.144154	0.384097	0.615903	0.717071	787.18	1.44793	-12.6957	809.301	7.07696	0.108782	1.01946	0.00454505	1.92649	0.0703438	3.00297	1.76283	0.513279
Amp1-3-2	Mg-Hbl	47.541	0.988	5.716	15.055	0.671	14.085	10.97	1.794	0.765	0	0.635	0.096	98.027	62.513	6.93042	0.98206	0.0875195	8	0	0.0207911	0	0.864368	3.06097	0.971022	0.0828514	5	2.22045e-15	1.71339	0.286609	2	0.220449	0.14227	0.362719	0.637281	0.759171	807.464	1.75127	-11.9609	811.587	7.06311	0.110411	1.00087	0	1.87053	0.0844375	3.11956	1.74625	0.51677
Amp1-3-3	Mg-Hbl	47.725	0.901	5.713	15.224	0.665	13.669	11.015	1.794	0.752	0	0.882	0.089	98.038	61.544	6.98614	0.985622	0.0282375	8	0	0.0709459	0	0.739002	2.9829	1.1247	0.0824516	5	0	1.72757	0.272435	2	0.23673	0.140433	0.377163	0.622837	0.726191	783.096	1.49735	-12.7363	805.471	7.10018	0.100827	1.00172	0	1.89412	0.0837973	3.03158	1.75582	0.517479
Amp1-5-1	Mg-Hbl	43.385	1.476	8.501	17.838	0.575	11.199	11.305	1.792	1.128	0.027	0.387	0.159	97.573	52.8089	6.51011	1.48989	0	8	0.0135107	0.166555	0.00320321	0.767746	2.50518	1.47072	0.0730807	5	0	1.81752	0.182485	2	0.338868	0.215933	0.554801	0.445199	0.630091	857.533	0.512584	-12.1632	884.606	6.62057	0.169423	1.52891	0.00325767	2.27645	0.0743205	2.54767	1.84842	0.530202
Amp1-5-2	Mg-Hbl	43.588	1.319	8.034	17.592	0.608	11.634	10.917	1.855	1.055	0.039	0.315	0.164	96.95	54.1025	6.53946	1.42057	0.0399713	8	0	0.108842	0.00462608	0.947067	2.60205	1.26016	0.0772618	5	0	1.75484	0.245162	2	0.294427	0.201924	0.496351	0.503649	0.67372	856.397	0.853134	-11.8519	875.313	6.67689	0.151978	1.45043	0.00472344	2.25361	0.0788853	2.65671	1.79178	0.550932
Amp1-5-3	Mg-Hbl	43.236	1.447	8.592	18.072	0.674	11.109	10.951	1.851	1.136	0.032	0.308	0.118	97.369	52.2827	6.48134	1.51799	0.000673624	8	0	0.162448	0.00379265	0.916343	2.48259	1.34925	0.0855786	5	0	1.75886	0.241139	2	0.296846	0.217249	0.514095	0.485905	0.647885	855.487	0.549844	-12.1635	885.849	6.61303	0.166477	1.54884	0.00386983	2.31163	0.0873173	2.53302	1.79466	0.54892
Amp1-5-4	Mg-Hbl	44.99	1.203	7.519	17.427	0.677	12.081	10.935	1.72	0.981	0.027	0.331	0.092	97.823	55.2702	6.65116	1.31007	0.0387695	8	0	0.0949731	0.00315586	0.974863	2.66253	1.1797	0.0847727	5	0	1.73204	0.267958	2	0.22505	0.185017	0.410067	0.589933	0.692964	833.585	1.03058	-12.1284	855.804	6.79513	0.136671	1.33844	0.00322428	2.2012	0.0866075	2.72015	1.76959	0.503683
Amp1-5-5	Mg-Hbl	44.982	1.122	7.59	17.435	0.688	11.918	10.913	1.7	0.868	0.017	0.396	0.102	97.541	54.9228	6.66666	1.32576	0.00757394	8	0	0.117477	0.00199201	0.970414	2.6332	1.19055	0.0863663	5	0	1.7329	0.267104	2	0.221394	0.164116	0.38551	0.61449	0.688643	821.687	0.942582	-12.4547	853.301	6.8103	0.127776	1.35433	0.00203499	2.20752	0.0882269	2.68992	1.77029	0.499026
Amp1-5-6	Mg-Hbl	46.713	1.019	6.772	16.758	0.593	12.672	10.97	1.623	0.738	0	0.381	0.081	98.142	57.4076	6.83335	1.16665	0	8	0.00088026	0.112097	0	0.904855	2.76345	1.14524	0.0734745	5	2.88658e-15	1.71934	0.280662	2	0.179657	0.137725	0.317382	0.682618	0.707001	791.709	1.16784	-12.8684	826.879	6.97043	0.114374	1.19096	0	2.09122	0.0749483	2.81887	1.75389	0.469556
Amp1-5-7	Mg-Hbl	45.817	1.208	6.835	16.249	0.587	12.879	10.975	1.622	0.827	0.025	0.437	0.104	97.358	58.5538	6.76178	1.18885	0.0493649	8	0	0.0847029	0.00291708	0.925921	2.83353	1.07956	0.0733768	5	0	1.73539	0.264608	2	0.199512	0.155704	0.355216	0.644784	0.724116	821.239	1.30832	-12.1078	838.393	6.90065	0.136855	1.21327	0.00297708	2.04666	0.0748836	2.8917	1.77109	0.473654
Amp1-6-1	Mg-Hbl	45.481	1.228	7.536	15.813	0.566	11.819	11.292	1.855	0.916	0.025	-	-	96.531	57.1227	6.82512	1.17488	0	8	0.157952	0.13858	0.00296615	0.390609	2.64406	1.59389	0.071942	5	0	1.81556	0.184444	2	0.355276	0.175362	0.530638	0.469362	0.623901	819.871	0.651405	-12.7824	841.217	6.88353	0.139801	1.34425	0.00299163	2.00148	0.0725576	2.66668	1.83116	0.544343
Amp1-6-2	Mg-Hbl	46.411	1.214	7.178	14.888	0.638	12.272	11.133	1.769	0.873	0.012	-	-	96.388	59.5017	6.92869	1.07131	0	8	0.191643	0.136292	0.0014164	0.365881	2.73122	1.49288	0.0806746	5	0	1.78074	0.219259	2	0.292779	0.166267	0.459046	0.540954	0.646581	803.784	0.806067	-12.9666	824.607	6.9842	0.137418	1.27308	0.00142779	1.87365	0.0813208	2.75309	1.79507	0.516144
Amp1-7-1	Mg-Hbl	48.042	1.031	6.214	14.115	0.605	13.154	11.593	1.564	0.714	0.009	-	-	97.041	62.4213	7.09113	0.908874	0	8	0.172112	0.114439	0.00105029	0.258073	2.89443	1.48426	0.0756372	5	0	1.83336	0.166637	2	0.280948	0.134448	0.415396	0.584604	0.661026	780.301	1.08989	-13.2001	800.369	7.1311	0.115113	1.08709	0.00105625	1.75215	0.0760634	2.91073	1.84376	0.450111
Amp1-7-2	Mg-Hbl	47.829	0.961	6.341	14.097	0.545	13.15	11.507	1.611	0.783	0.09	-	-	96.914	62.4441	7.06962	0.930379	0	8	0.174252	0.10682	0.0105177	0.277991	2.89762	1.46457	0.0682319	5	0	1.82232	0.177676	2	0.284007	0.147648	0.431655	0.568345	0.664258	783.562	1.1092	-13.1078	803.426	7.11257	0.107495	1.11135	0.0105819	1.75315	0.0686463	2.91521	1.83346	0.464492
Amp1-8-1	Mg-Hbl	48.445	0.241	4.563	15.274	0.361	13.821	11.441	1.15	0.666	0.08	0.475	0.076	96.376	61.728	7.177	0.796708	0.0262934	8	0	0.000555963	0.00937038	0.698027	3.05242	1.19433	0.0452988	5	0	1.816	0.183997	2	0.146323	0.125872	0.272195	0.727805	0.718766	746.466	1.83653	-13.2373	774.552	7.28756	0.0272697	0.808986	0.00951503	1.92151	0.0459966	3.09943	1.84404	0.335412
Amp1-8-2	Mg-Hbl	50.527	0.178	3.632	15.423	0.414	14.507	11.594	1.004	0.466	0.02	0.632	0.03	98.154	62.6388	7.41194	0.588058	0	8	0.0398684	0.0196359	0.00231959	0.75262	3.17246	0.961652	0.0514393	5	0.177782	1.82222	2.22045e-16	2	0.285553	0.0872078	0.372761	0.627239	0.735747	747.987	1.84508	-13.1989	750.464	7.43355	0.019698	0.629761	0.00232643	1.89757	0.0515891	3.1817	1.82759	0.286387
Amp1-9-1	Mg-Hbl	49.73	0.41	4.532	15.811	0.453	12.716	11.388	1.134	0.543	0.025	-	-	96.742	58.9073	7.34963	0.65037	0	8	0.13902	0.0455674	0.00292119	0.383498	2.80161	1.57067	0.0567063	5	0	1.80324	0.196762	2	0.128179	0.102378	0.230557	0.769443	0.640766	713.597	1.30679	-14.567	754.12	7.41139	0.0459616	0.796028	0.00294583	1.97059	0.0571827	2.82514	1.81845	0.327674
Amp1-9-2	Mg-Hbl	49.466	0.262	4.306	15.095	0.435	13.375	11.464	1.099	0.579	0	-	-	96.081	61.2303	7.33505	0.664951	0	8	0.087581	0.029216	0	0.450763	2.95666	1.42115	0.0546351	5	0	1.82134	0.17866	2	0.137304	0.109531	0.246835	0.753165	0.675374	717.94	1.57847	-14.188	754.743	7.40762	0.0295123	0.759981	0	1.89043	0.0551755	2.98589	1.83942	0.319092
Amp1-9-3	Mg-Hbl	47.807	0.478	5.071	16.172	0.466	12.736	11.329	1.4	0.697	0.013	-	-	96.169	58.398	7.13874	0.861256	0	8	0.0311832	0.0536761	0.00153478	0.558064	2.83514	1.46147	0.0589389	5	0	1.81251	0.18749	2	0.217835	0.132777	0.350612	0.649388	0.659855	747.42	1.32576	-13.7216	784.646	7.22639	0.0543485	0.9034	0.00155367	2.04432	0.0596624	2.86993	1.83482	0.410303
Amp1-9-4	Mg-Hbl	47.053	1.188	6.446	16.121	0.459	11.835	11.174	1.599	0.784	0.005	-	-	96.664	56.6828	7.02596	0.974038	0	8	0.160355	0.133401	0.000590285	0.358692	2.6345	1.65441	0.058052	5	0	1.78766	0.212337	2	0.250589	0.149347	0.399936	0.600064	0.614258	776.964	0.744665	-13.6158	808.612	7.08114	0.134481	1.14331	0.000594939	2.02892	0.0585078	2.65517	1.80176	0.466564
Amp1-10-1	Mg-Hbl	47.42	1.174	6.569	15.583	0.484	12.422	11.173	1.652	0.781	0	-	-	97.258	58.6925	7.00482	0.995175	0	8	0.148466	0.130415	0	0.428894	2.73551	1.49616	0.0605574	5	0	1.76833	0.231667	2	0.241474	0.14718	0.388653	0.611347	0.646437	781.793	0.908596	-13.3448	810.332	7.07071	0.131674	1.1544	0	1.94316	0.0611269	2.76122	1.78503	0.477594
Amp1-10-2	Mg-Hbl	47.364	1.142	6.431	15.86	0.452	12.19	11.37	1.543	0.742	0	-	-	97.094	57.8056	7.02722	0.972784	0	8	0.151739	0.127416	0	0.367113	2.69618	1.60075	0.0568014	5	0	1.8074	0.192601	2	0.251258	0.140443	0.391701	0.608299	0.627467	778.759	0.846672	-13.4747	808.187	7.08371	0.128472	1.13357	0	1.98368	0.057258	2.71785	1.82199	0.447431
Amp1-10-3	Mg-Hbl	48.573	0.533	4.643	16.721	0.404	12.167	11.277	1.388	0.558	0.051	-	-	96.315	56.4647	7.26219	0.737809	0	8	0.0803279	0.059927	0.0060286	0.409924	2.71186	1.68077	0.0511611	5	0	1.80645	0.193554	2	0.208798	0.106431	0.315229	0.684771	0.617365	724.414	1.12051	-14.483	767.969	7.32746	0.0604805	0.825495	0.00608297	2.10949	0.0516209	2.73622	1.82274	0.405971
Average		46.7232	0.934524	6.2921	15.7466	0.499881	12.9907	11.2414	1.58995	0.842381	0.0427857	0.59471	0.109129	97.22	59.4819	6.92013	1.05903	0.0208345	8	0.0400687	0.0833541	0.00500585	0.677809	2.86768	1.26335	0.0627387	5	0.00997616	1.78403	0.20599	2	0.250788	0.159255	0.410043	0.589957	0.69287	797.866	1.26983	-12.6638	819.083	7.01768	0.105749	1.11514	0.00508305	1.9791	0.0636428	2.90826	1.80933	0.463379
1σ		1.58809	0.305656	1.11617	1.03283	0.109518	0.882426	0.220406	0.226951	0.168045	0.0537138	0.148905	0.0320783	0.576857	3.05978	0.214269	0.210789	0.0267601	4.94137e-16	0.0629508	0.0440872	0.00625048	0.206186	0.18098	0.203973	0.0138381	7.99126e-16	0.0451484	0.0348918	0.0573501	3.42622e-17	0.0689342	0.0321665	0.0861963	0.0861963	0.0408295	35.9825	0.374344	0.721273	32.2174	0.195257	0.0349947	0.204206	0.00635924	0.142323	0.0141209	0.182195	0.0310956	0.0678715
Max		50.527	1.476	8.592	18.072	0.688	14.507	11.594	1.889	1.3	0.286	0.882	0.19	98.186	63.9397	7.41194	1.51799	0.0875195	8	0.191643	0.166555	0.0331001	1.00313	3.17246	1.68077	0.0863663	5	0.241217	1.83336	0.286609	2	0.514645	0.24592	0.672017	0.769443	0.759171	869.916	1.88017	-11.2397	885.849	7.43355	0.169423	1.54884	0.033735	2.31163	0.0882269	3.19793	1.85346	0.552562
Min		43.236	0.178	3.632	14.097	0.361	11.109	10.872	1.004	0.466	0	0.308	0.03	96.081	52.2827	6.48134	0.588058	0	8	0	0.000555963	0	0.258073	2.48259	0.799837	0.0452988	5	0	1.71339	-1.33227e-15	2	0.107562	0.0872078	0.230557	0.327983	0.614258	713.597	0.512584	-14.567	750.464	6.61303	0.019698	0.629761	0	1.75215	0.0459966	2.53302	1.74625	0.286387
R2010: Ridolfi, F., Renzulli, A., Puerini, M., 2010. Stability and chemical equilibrium of amphibole in calc-alkaline magmas: an overview, new thermobarometric formulations and application to subduction-related volcanoes. Contributions to Mineralogy and Petrology 160, 45-66.
P2016: Putirka, K., 2016. Amphibole thermometers and barometers for igneous systems and some implications for eruption mechanisms of felsic magmas at arc volcanoes. American Mineralogist 101, 841-858.
HS12-05 is a granite porphyry sample from: Wang, X.S., Bi, X.W., Leng, C.B., Zhong, H., Tang, H.F., Chen, Y.W., Yin, G.H., Huang, D.Z., Zhou, M.F., 2014. Geochronology and geochemistry of Late Cretaceous igneous intrusions and Mo–Cu–(W) mineralization in the southern Yidun Arc, SW China: implications for metallogenesis and geodynamic setting. Ore Geology Reviews 61, 73-95.
H2022: Higgins, O., Sheldrake, T., & Caricchi, L. 2022. Machine learning thermobarometry and chemometry using amphibole and clinopyroxene: a window into the roots of an arc volcano (Mount Liamuiga, Saint Kitts). Contributions to Mineralogy and Petrology, 177(1), 1-22.
[truncated: 25 more columns]

## Sheet: Clinopyroxene
Table S2.4. Major element compositions of clinopyroxene and physicochemical conditions of crystallization
Samples No.	comments	SiO2	TiO2	Al2O3	FeO	MnO	MgO	CaO	Na2O	K2O	Cr2O3	Total (wt%)	Mg#	Si	Ti	Al(IV)	Al(VI)	Altotal	Fe	Mn	Mg	Ca	Na	K	Cr	Sum (6 O)	Wo	En	Fs	XJd	XCaTs	XCaTi	XCrCaTs	XDiHd	XEnFs	Sum	Melt composition in equilibrium	KD(Fe-Mg)cpx-liq	H2022-T (°C)	uncertainty-T (°C)	H2022-P (kbar)	uncertainty-P (kbar)	SiO2 (pred)	uncertainty (wt.%)	Al2O3 (pred)	uncertainty (wt.%)	CaO (pred)	uncertainty (wt.%)	Na2O (pred)
Cpx-1-1	diopside	52.492	0.116	0.726	10.237	0.541	12.656	22.448	0.424	0	0	99.64	68.7854	1.98343	0.00329695	0.0165676	0.0157633	0.0323309	0.323484	0.0173144	0.712901	0.908814	0.0310626	0	0	4.01264	46.7209	36.6493	16.6299	0.0157633	0	0.00828381	0	0.90053	0.0679275	0.992505	11ZK52-1095 (Whole-rock data)	0.2206	911	62.5	4.3	3	71.2	2.25	14.8	2.2	3.6	0.7	3.5
Cpx-1-2	diopside	52.426	0.084	0.715	10.462	0.586	12.803	22.651	0.428	0	0	100.155	68.5661	1.97513	0.00238044	0.024873	0.00687467	0.0317476	0.329624	0.0186995	0.719066	0.914342	0.0312636	0	0	4.02225	46.5781	36.6304	16.7916	0.00687467	0	0.0124365	0	0.901906	0.073392	0.994609		0.22286	909	55	4.3	3	71.2	2.2	14.8	2.2	3.6	0.7	3.5
Cpx-1-3	diopside	52.251	0.06	0.729	10.487	0.496	12.55	22.586	0.384	0	0.03	99.573	68.0825	1.97935	0.00170966	0.0206462	0.011901	0.0325472	0.332228	0.0159146	0.70873	0.91673	0.0282038	0	0.000898468	4.01632	46.8272	36.2024	16.9704	0.011901	0	0.0103231	0.000449234	0.905957	0.0675005	0.996131		0.227896	925	72.5	4.8	3.25	68.5	3.65	14.9	2.55	3.8	0.85	3.5
Cpx-1-4	diopside	52.392	0.109	0.689	10.988	0.545	12.578	22.41	0.426	0.007	0.051	100.195	67.1092	1.97635	0.00309282	0.0236492	0.00698274	0.030632	0.346636	0.0174133	0.707325	0.905762	0.031157	0.000336865	0.00152097	4.02023	46.2189	36.0931	17.688	0.00698274	0	0.0118246	0.000760487	0.893177	0.0803923	0.993137		0.238251	925	76	4.7	3.25	68.5	3.65	14.6	3.45	3.8	0.85	3.5
Cpx-1-5	diopside	52.198	0.087	0.593	11.263	0.575	11.877	22.782	0.382	0.01	0.041	99.808	65.273	1.98192	0.00248474	0.0180775	0.0084591	0.0265365	0.357637	0.0184921	0.672277	0.926825	0.0281218	0.000484386	0.00123075	4.01601	47.3658	34.357	18.2772	0.0084591	0	0.00903873	0.000615374	0.917171	0.0563716	0.991656		0.258628	924	72.5	5.1	3.35	68.6	3.65	14.6	3.4	3.7	0.95	3.5
Cpx-2-1	diopside	51.765	0.096	0.744	12.938	0.644	11.433	22.485	0.433	0.007	0.017	100.562	61.1665	1.96657	0.0027433	0.0334312	0	0.0333122	0.411051	0.0207226	0.647503	0.915248	0.0318939	0.000339258	0.000510592	4.02989	46.3698	32.8048	20.8254	0	0	0.0167156	0.000255296	0.898277	0.0801384	0.995387		0.308628	920	66	5	3.5	70.7	2.95	14.8	2.15	3.7	0.75	3.5
Cpx-2-2	diopside	52.018	0.07	0.636	11.469	0.617	11.904	22.583	0.428	0	0	99.725	64.9128	1.97866	0.00200283	0.0213423	0.00716991	0.0285122	0.364837	0.0198787	0.675023	0.92039	0.0315652	0	0	4.02087	46.9527	34.4356	18.6118	0.00716991	0	0.0106712	0	0.909719	0.0650705	0.99263		0.262761	908	55.5	4.8	3.15	71	2.25	14.8	2.45	3.7	0.75	3.5
Cpx-2-3	diopside	52.865	0.051	0.366	11.199	0.591	11.861	23.007	0.247	0.003	0.017	100.207	65.3716	1.99598	0.0014484	0.00401868	0.0122678	0.0162864	0.353609	0.0189	0.667603	0.930725	0.0180814	0.0001445	0.000507446	4.00329	47.6821	34.2021	18.1158	0.0122678	0	0.00200934	0.000253723	0.928462	0.046375	0.989368		0.257505	917	64	4.8	2.6	69.9	2.55	14.6	3.45	3.7	0.85	3.4
Cpx-2-4	diopside	51.822	0.073	1.222	11.405	0.448	11.751	22.568	0.534	0.007	0	99.83	64.7454	1.96728	0.00208451	0.0327249	0.0219489	0.0546738	0.362078	0.014405	0.665019	0.917946	0.0393042	0.000339006	0	4.02313	47.1941	34.1905	18.6154	0.0219489	0	0.0163624	0	0.901584	0.0627569	1.00265		0.264697	935	66	5.3	3.1	69.8	4.85	15.5	1.3	3.8	1.2	3.4
Cpx-3-1	diopside	52.63	0.005	0.325	11.124	0.5	11.71	23.153	0.388	0	0.045	99.88	65.2335	1.9953	0.000142585	0.0047028	0.0098188	0.0145216	0.352688	0.0160557	0.66182	0.940491	0.0285202	0	0.00134877	4.01089	48.107	33.8527	18.0403	0.0098188	0	0.0023514	0.000674387	0.937465	0.0385214	0.988831		0.259079	930	72.5	5	3.25	68.3	4.2	14.6	3.45	3.9	1.1	3.5
Cpx-3-2	diopside	52.659	0.011	0.356	11.114	0.658	12.024	23.18	0.412	0.001	0.014	100.429	65.8514	1.98721	0.000312244	0.012788	0.0030456	0.0158336	0.35075	0.0210321	0.67644	0.937256	0.030145	4.81427e-05	0.000417688	4.01945	47.711	34.4341	17.8549	0.0030456	0	0.00639398	0.000208844	0.930653	0.0482685	0.98857		0.252087	912	62.5	4.8	3.15	70.1	2.45	14.8	3.4	3.7	0.9	3.5
Cpx-3-3	diopside	52.616	0.028	0.373	11.282	0.627	11.914	23.014	0.458	0.003	0.024	100.339	65.3053	1.98809	0.000795805	0.0119067	0.00470387	0.0166106	0.356501	0.0200665	0.671097	0.931717	0.033553	0.00014461	0.00071694	4.0193	47.5532	34.2516	18.1952	0.00470387	0	0.00595335	0.00035847	0.925406	0.0510962	0.987517		0.25826	912	60.5	4.9	3.25	69.7	2.7	14.8	3.4	3.6	0.85	3.5
Cpx-4-1	diopside	52.541	0.043	0.575	11.043	0.551	12.429	22.75	0.385	0.003	0.021	100.341	66.7348	1.98057	0.00121924	0.0194301	0.00611558	0.0255456	0.348125	0.0175925	0.698452	0.918854	0.0281384	0.000144269	0.000625841	4.01927	46.7508	35.5368	17.7124	0.00611558	0	0.00971503	0.00031292	0.908826	0.0688755	0.993845		0.242315	919	72.5	4.9	3.2	69.7	3.3	14.6	3.4	3.7	0.8	3.5
Cpx-4-2	diopside	51.85	0.075	0.602	12.79	0.73	10.942	22.058	0.401	0.004	0	99.452	60.3944	1.98749	0.00216246	0.012507	0.0146893	0.0271963	0.41	0.0237009	0.625262	0.905933	0.0298022	0.000195603	0	4.01175	46.6688	32.2102	21.121	0.0146893	0	0.00625349	0	0.89968	0.067791	0.988413		0.318788	903	57	4.8	3.25	71.3	2.3	14.7	2.55	3.7	0.8	3.5
Cpx-4-3	diopside	52.227	0.02	0.265	12.325	0.738	11.126	23.21	0.36	0	0	100.271	61.6717	1.98722	0.000572414	0.0127791	0	0.0118838	0.392188	0.0237844	0.631101	0.946236	0.0265583	0	0	4.01954	48.0439	32.0433	19.9128	0	0	0.00638955	0	0.939846	0.0417211	0.987957		0.302118	900	55.5	5	3.2	70.7	2.3	14.8	3.1	3.6	0.85	3.5
Cpx-4-4	diopside	52.723	0.027	0.474	10.617	0.77	12.635	22.645	0.429	0	0.018	100.338	67.9613	1.98466	0.000764502	0.0153424	0.00568673	0.0210291	0.334228	0.0245506	0.709038	0.913337	0.0313105	0	0.000535686	4.01945	46.6797	36.2382	17.0821	0.00568673	0	0.00767119	0.000267843	0.905398	0.0689341	0.987958		0.229169	907	55	4.4	3.15	70.4	2.55	14.6	3.35	3.7	0.8	3.5
Cpx-4-5	diopside	52.452	0.035	0.457	11.694	0.595	11.709	22.83	0.426	0.005	0	100.203	64.0898	1.98706	0.000997346	0.0129418	0.00746247	0.0204043	0.370482	0.019092	0.661267	0.926675	0.03129	0.000241645	0	4.01751	47.3174	33.7653	18.9174	0.00746247	0	0.00647092	0	0.920204	0.0557726	0.98991		0.272378	908	57.5	5	3.25	70.9	2.4	14.8	3.1	3.5	0.8	3.5
Cpx-5-1	diopside	52.036	0.059	0.58	11.015	0.549	12.103	22.648	0.375	0.006	0.007	99.378	66.199	1.98173	0.00169013	0.0182735	0.00775951	0.026033	0.350817	0.0177091	0.687134	0.924151	0.0276897	0.000291507	0.000210761	4.01745	47.1	35.0203	17.8796	0.00775951	0	0.00913676	0.000105381	0.914909	0.061521	0.993431		0.24821	914	64	5	3.25	70.3	2.45	14.6	3.25	3.6	0.8	3.5
Cpx-5-2	diopside	52.22	0.084	0.681	11.103	0.604	11.992	22.699	0.381	0.002	0.06	99.826	65.8138	1.98044	0.00239626	0.0195579	0.010881	0.0304389	0.352145	0.019402	0.677993	0.92237	0.0280154	9.6764e-05	0.00179899	4.0151	47.2403	34.7242	18.0355	0.010881	0	0.00977897	0.000899496	0.911691	0.0592235	0.992474		0.252509	925	80	5	3.25	68.5	3.65	14.6	3.45	3.8	0.95	3.5
Cpx-5-3	diopside	52.166	0.028	0.467	11.564	0.62	11.739	22.779	0.46	0	0.011	99.834	64.4053	1.98398	0.00080101	0.0160162	0.00491645	0.0209327	0.367802	0.0199723	0.665565	0.928236	0.03392	0	0.000330747	4.02154	47.3203	33.9296	18.7501	0.00491645	0	0.00800811	0.000165373	0.920062	0.0566523	0.989805		0.268662	909	58	5	3.25	70.4	2.6	14.7	3.2	3.6	0.85	3.5
Cpx-5-4	diopside	51.726	0.047	0.66	11.685	0.599	11.643	22.505	0.425	0.009	0.033	99.332	63.9773	1.9781	0.00135197	0.0218969	0.00784998	0.0297468	0.373701	0.0194022	0.663764	0.92213	0.031512	0.000439077	0.000997715	4.02115	47.0572	33.8725	19.0703	0.00784998	0	0.0109484	0.000498858	0.910683	0.0633911	0.993371		0.273711	920	70.5	5	3.25	68.7	3.45	14.6	3.05	3.7	0.8	3.5
Cpx-5-5	diopside	51.097	0.103	0.779	13.114	0.611	10.84	22.383	0.416	0	0.039	99.382	59.5691	1.96776	0.00298362	0.032239	0.00311772	0.0353567	0.422346	0.0199298	0.622321	0.923567	0.0310611	0	0.00118739	4.02651	46.9236	31.6183	21.4581	0.00311772	0	0.0161195	0.000593696	0.906854	0.0689067	0.995591		0.32994	930	81	5	3.4	68.4	3.95	14.8	2.2	3.9	0.95	3.5
Cpx-5-6	diopside	51.554	0.086	0.677	12.558	0.637	10.777	22.411	0.4	0.006	0.005	99.111	60.4688	1.98346	0.00248879	0.0165395	0.0141583	0.0306978	0.404052	0.020758	0.618113	0.923837	0.0298379	0.00029449	0.000152084	4.01369	47.4736	31.7632	20.7632	0.0141583	0	0.00826975	7.6042e-05	0.915492	0.0533367	0.991332		0.317798	918	65.5	5	3.25	70.9	2.5	14.7	2.2	3.7	0.85	3.5
Cpx-5-7	diopside	51.913	0.033	0.767	12.161	0.497	11.411	22.761	0.372	0	0.017	99.932	62.582	1.97636	0.000945003	0.0236403	0.0107742	0.0344146	0.387182	0.0160262	0.647623	0.928441	0.0274587	0	0.000511672	4.01896	47.2911	32.9874	19.7215	0.0107742	0	0.0118202	0.000255836	0.916365	0.0592199	0.998435		0.290653	920	71	5.4	3.3	69.7	3.65	14.8	2.2	3.7	0.9	3.5
Cpx-6-1	diopside	52.497	0.056	0.791	10.73	0.499	11.541	22.638	0.483	0	0.003	99.238	65.72	1.99602	0.00160158	0.00397822	0.0314675	0.0354458	0.341182	0.01607	0.654158	0.922236	0.0356062	0	9.01788e-05	4.00241	48.0938	34.1138	17.7924	0.0314675	0	0.00198911	4.50894e-05	0.920202	0.0375694	0.991273		0.253562	918	58.5	5	3.15	71.7	2.95	14.7	2.2	3.5	0.8	3.4
Cpx-6-2	diopside	53.289	0.105	0.504	10.209	0.495	11.66	23.579	0.332	0	0.004	100.177	67.0595	2.00389	0.00296999	-0.00389108	0.026228	0.022337	0.321052	0.0157662	0.653648	0.950025	0.0242059	0	0.000118918	3.99401	49.359	33.9606	16.6804	0.0242059	0.00202211	0	5.94592e-05	0.947943	0.0133782	0.987609		0.238788	924	64.5	5	3	70.5	3.45	14.6	3.15	3.7	0.95	3.5
Cpx-6-3	diopside	52.569	0.049	0.493	10.298	0.542	11.742	23.359	0.354	0	0.013	99.419	67.0225	1.99571	0.00139925	0.00428542	0.0177729	0.0220583	0.326947	0.0174282	0.664537	0.950159	0.0260567	0	0.00039018	4.00469	48.9358	34.2255	16.8387	0.0177729	0	0.00214271	0.00019509	0.947821	0.0218318	0.989763		0.239188	918	68.5	5	3.15	69.9	2.9	14.7	3.4	3.5	0.85	3.6
Cpx-7-1	diopside	52.983	0.06	0.587	10.311	0.494	11.836	22.974	0.446	0.022	0.01	99.723	67.1707	2.0012	0.00170465	-0.00119765	0.0273282	0.0261305	0.325694	0.0158039	0.666449	0.929744	0.0326614	0.00106007	0.000298611	4.00074	48.3766	34.6768	16.9466	0.0273282	0	0	0.000149306	0.929594	0.0312745	0.988346		0.237588	921	62.5	4.6	3.15	70.6	3.4	14.6	3.25	3.6	0.8	3.5
Cpx-7-2	diopside	52.683	0.004	0.321	10.282	0.488	11.783	23.448	0.418	0.011	0.026	99.464	67.1338	1.99956	0.000114197	0.000439198	0.0139199	0.0143591	0.326361	0.0156881	0.666697	0.953549	0.0307601	0.000532617	0.000780171	4.0084	48.9852	34.2492	16.7656	0.0139199	0	0.000219599	0.000390086	0.952939	0.0200591	0.987528		0.237985	925	70	4.9	3.25	68.7	4	14.7	3.4	3.7	0.9	3.5
Cpx-7-3	diopside	52.726	0.129	1.041	10.604	0.459	11.523	22.891	0.51	0	0	99.883	65.9506	1.99038	0.00366295	0.00961715	0.0366976	0.0463148	0.334763	0.0146761	0.648464	0.925869	0.0373275	0	0	4.00146	48.4978	33.9671	17.5352	0.0366976	0	0.00480857	0	0.921061	0.0310832	0.99365		0.250976	929	60	5.2	3.2	71.3	4.2	15	1.45	3.7	1	3.4
Cpx-7-4	diopside	52.326	0.127	0.724	11.935	0.531	10.933	22.771	0.434	0.002	0.009	99.792	62.0175	1.99106	0.00363496	0.00894321	0.0235252	0.0324685	0.379791	0.0171138	0.620175	0.928371	0.0320186	9.70856e-05	0.000270745	4.005	48.1436	32.1611	19.6953	0.0235252	0	0.0044716	0.000135373	0.923764	0.038101	0.989997		0.297722	911	62.5	5	3.25	70.5	2.65	14.9	2.2	3.5	0.85	3.5
Cpx-7-5	diopside	52.928	0.052	0.293	10.708	0.496	11.677	23.235	0.245	0	0.002	99.636	66.0295	2.00523	0.00148187	-0.00522788	0.0183107	0.0130829	0.339268	0.0159164	0.659505	0.943179	0.0179966	0	5.99047e-05	3.99572	48.5686	33.9609	17.4705	0.0179966	0.000314099	0	2.99523e-05	0.942835	0.027969	0.989144		0.250095	919	64.5	4.8	2.55	70	3	14.8	3.3	3.6	0.9	3.4
Cpx-8-1	diopside	52.348	0.067	0.597	11.476	0.684	10.815	22.701	0.549	0.002	0	99.239	62.6834	2.00046	0.0019259	-0.000459216	0.0273474	0.0268881	0.366755	0.0221397	0.616119	0.929496	0.040677	9.7503e-05	0	4.00456	48.6044	32.2176	19.178	0.0273474	0	0	0	0.929496	0.0266889	0.983533		0.289396	900	49	5.6	3.25	72.1	2.35	14.8	2.45	3.4	0.9	3.4
Cpx-8-2	diopside	52.969	0.086	0.63	10.376	0.533	11.854	23.047	0.393	0	0	99.888	67.0655	1.99812	0.00244022	0.00187577	0.0261333	0.028009	0.327331	0.0170299	0.666614	0.931512	0.0287435	0	0	3.9998	48.3788	34.6211	17.0002	0.0261333	0	0.000937884	0	0.930574	0.0316853	0.98933		0.238723	909	62.5	5	3.25	70.4	2.65	14.8	2.95	3.5	0.8	3.5
Cpx-9-1	diopside	52.821	0	0.39	10.299	0.429	11.596	23.278	0.415	0.009	0.013	99.25	66.7432	2.00638	0	-0.00637628	0.0238356	0.0174593	0.327157	0.0138022	0.656633	0.947381	0.0305634	0.000436121	0.000390393	4.0002	49.0573	34.0018	16.9409	0.0238356	0	0	0.000195196	0.947186	0.0183023	0.989519		0.242223	944	69	5	3.4	65.2	4.45	15	3.45	4.1	1.4	3.6
Cpx-9-2	diopside	52.328	0.075	0.727	11.239	0.459	11.085	23.038	0.339	0	0	99.29	63.742	1.99497	0.00215077	0.00502936	0.0276365	0.0326658	0.358332	0.0148218	0.630009	0.941066	0.0250582	0	0	3.99907	48.7749	32.653	18.5721	0.0250582	0.0025783	0.00122553	0	0.937263	0.0255393	0.991664		0.276516	925	72.5	5	3.15	70.6	3.2	14.9	2.2	3.7	0.95	3.5
Cpx-9-3	diopside	52.254	0.012	0.658	11.067	0.575	11.304	22.785	0.397	0	0.012	99.064	64.5466	1.99576	0.000344746	0.00424289	0.0253761	0.029619	0.353487	0.0186012	0.643619	0.932417	0.0293985	0	0.000362345	4.00361	48.3237	33.3564	18.3199	0.0253761	0	0.00212145	0.000181172	0.930115	0.0334959	0.991289		0.267009	911	62.5	5	3.25	70	2.8	14.8	3.15	3.5	0.85	3.5
Cpx-9-4	diopside	51.988	0	0.717	11.455	0.542	11.118	22.799	0.429	0	0.031	99.079	63.3699	1.99013	0	0.00986774	0.0224808	0.0323486	0.366716	0.0175737	0.634474	0.935121	0.0318407	0	0.000938195	4.00914	48.2939	32.7672	18.9389	0.0224808	0	0.00493387	0.000469097	0.929718	0.0357362	0.993338		0.280994	912	72.5	5	3.25	68.7	2.95	14.9	2.3	3.5	0.8	3.5
Cpx-9-5	diopside	52.492	0.057	0.682	10.744	0.559	11.813	22.704	0.436	0	0	99.487	66.2137	1.99219	0.0016272	0.00780944	0.0226961	0.0305056	0.341004	0.0179694	0.668354	0.923237	0.0320827	0	0	4.00697	47.7719	34.5832	17.6449	0.0226961	0	0.00390472	0	0.919332	0.0450129	0.990946		0.248047	908	57.5	4.6	3.1	70.9	2.3	14.8	2.55	3.5	0.75	3.4
Cpx-9-6	diopside	52.626	0.041	0.653	10.126	0.509	11.786	23.052	0.377	0	0.015	99.185	67.4759	1.9982	0.00117099	0.00179727	0.0274247	0.029222	0.321539	0.0163698	0.667136	0.937823	0.0277541	0	0.00045028	3.99967	48.6802	34.6295	16.6903	0.0274247	0	0.000898635	0.00022514	0.936699	0.0259875	0.991235		0.234315	925	68.5	5	3.25	69.9	3.85	14.6	3.15	3.6	0.9	3.5
Cpx-10-1	diopside	53.022	0.124	0.678	9.563	0.538	12.362	23.109	0.357	0.001	0.024	99.778	69.7349	1.99523	0.00350984	0.00477239	0.0252969	0.0300693	0.300945	0.0171476	0.693479	0.931731	0.0260466	4.80059e-05	0.000714003	3.99892	48.3726	36.0033	15.6241	0.0252969	0	0.00238619	0.000357002	0.928988	0.032718	0.989746		0.210976	919	70	4.8	2.9	69.6	3.55	14.7	2.9	3.7	0.85	3.5
Cpx-11-1	diopside	52.923	0.066	0.506	9.114	0.382	12.886	23.306	0.328	0	0	99.511	71.592	1.99353	0.00187004	0.00647321	0.0159907	0.0224639	0.287106	0.0121878	0.72361	0.940629	0.0239551	0	0	4.00535	48.2041	37.0826	14.7132	0.0159907	0	0.0032366	0	0.937393	0.0366616	0.993282		0.192894	950	67	4.8	2.6	63.7	4.05	15	3.45	4.5	1.5	3.6
Cpx-11-2	diopside	52.484	0.117	1.157	10.202	0.413	11.805	22.68	0.444	0	0.01	99.312	67.347	1.98788	0.00333332	0.0121247	0.0395232	0.0516479	0.32315	0.0132494	0.666556	0.920404	0.0326056	0	0.000299443	3.99912	48.1859	34.8962	16.9179	0.0326056	0.00691759	0.00260355	0.000149722	0.910733	0.0394864	0.992496		0.235694	940	63	4.8	3.15	65.5	4.7	15.5	1.45	4.2	1.35	3.7
Cpx-11-3	diopside	52.842	0.04	0.676	9.359	0.476	12.285	23.41	0.332	0.016	0.05	99.486	70.0572	1.99457	0.00113569	0.00542703	0.0246458	0.0300728	0.295431	0.0152182	0.691281	0.946772	0.0242972	0.000770458	0.00149208	4.00104	48.9671	35.7531	15.2797	0.0242972	0.000348622	0.0025392	0.000746042	0.943138	0.021787	0.992856		0.20777	940	74	4.9	2.75	66	4.25	14.7	3.45	4.2	1.5	3.6
Average		52.4031	0.0612955	0.620068	11.0394	0.555273	11.7684	22.8489	0.404364	0.00309091	0.0152727	99.7192	65.5215	1.98829	0.00174875	0.0117141	0.0160451	0.0277362	0.350414	0.0178497	0.665544	0.92888	0.0297528	0.000149591	0.000458136	4.01082	47.7664	34.2203	18.0133	0.0157683	0.000276835	0.00594011	0.000229068	0.922434	0.0467619	0.99141		0.256999	919.295	65.2727	4.91591	3.15568	69.6182	3.18409	14.7818	2.82386	3.70455	0.913636	3.49773
1σ		0.436488	0.0359713	0.201561	0.885623	0.0842303	0.534338	0.328621	0.0591754	0.00477597	0.0161546	0.406478	2.61031	0.00990969	0.00102504	0.00990969	0.00998624	0.0090281	0.0296138	0.00273605	0.0273574	0.0118706	0.00438458	0.000230682	0.000484461	0.00932764	0.822222	1.35081	1.45882	0.0095467	0.00112247	0.00471991	0.00024223	0.0153207	0.0182262	0.00327278		0.0300462	11.1714	7.02872	0.238311	0.199777	1.73248	0.73907	0.195719	0.616671	0.208844	0.190204	0.0583432
Max		53.289	0.129	1.222	13.114	0.77	12.886	23.579	0.549	0.022	0.06	100.562	71.592	2.00638	0.00366295	0.0334312	0.0395232	0.0546738	0.422346	0.0245506	0.72361	0.953549	0.040677	0.00106007	0.00179899	4.02989	49.359	37.0826	21.4581	0.0366976	0.00691759	0.0167156	0.000899496	0.952939	0.0803923	1.00265		0.32994	950	81	5.6	3.5	72.1	4.85	15.5	3.45	4.5	1.5	3.7
Min		51.097	0	0.265	9.114	0.382	10.777	22.058	0.245	0	0	99.064	59.5691	1.96657	0	-0.00637628	0	0.0118838	0.287106	0.0121878	0.616119	0.905762	0.0179966	0	0	3.99401	46.2189	31.6183	14.7132	0	0	0	0	0.893177	0.0133782	0.983533		0.192894	900	49	4.3	2.55	63.7	2.2	14.6	1.3	3.4	0.7	3.4
Higgins2022: Higgins, Oliver, Tom Sheldrake, and Luca Caricchi. "Machine learning thermobarometry and chemometry using amphibole and clinopyroxene: a window into the roots of an arc volcano (Mount Liamuiga, Saint Kitts)." Contributions to Mineralogy and Petrology 177.1 (2022): 1-22.
Predicted compositions of equilibrium melt are also estimated using the codes from Higgins et al. (2022)
[truncated: 5 more columns]
