# Supplementary material for: Magmatic Processes of Granitoids in the Hongniu-Hongshan Porphyry-Skarn Copper Deposit, Southern Yidun Terrane, China: Evidence from Mineral Geochemistry
Source: MDPI journal article supplement (doi:10.3390/min12121559), 2022-12-02
Supplement: s1 [file s1 › Table S3 LA-ICP-MS data.xlsx]

## Sheet: plagioclase
An mole percent (mol%) for plagioclase is calculated based on EPMA data.
	Table S3.1 Trace elements data (LA-ICP-MS) for PL1 plagioclase phenocryst
	An mol%	Comment	Sample	Mg (ppm)	Ti (ppm)	Mn (ppm)	Rb (ppm)	Sr (ppm)	Ba (ppm)	La (ppm)	Sm (ppm)	Eu (ppm)	Gd (ppm)
	47.94	Cores	PL1-LA-3	151.614	144.752	26.4738	1.60935	1679.17	139.765	11.6041	0.32101	0.988621	0.11894
	46.43		PL1-LA-4	182.986	116.425	25.5617	1.71652	1645.8	145.581	12.0894	0.155763	0.98365	0.113884
	45.42		PL1-LA-5	149.453	181.426	21.9177	0.952683	1664.19	146.116	10.9305	0.116128	0.956521	0.132688
	42.11		PL1-LA-6	173.709	132.071	16.0842	1.32256	1723.98	160.635	10.6846	0.254259	0.883061	0.147413
	43.51		PL1-LA-7	260.692	100.411	34.4515	4.79638	1539.83	134.617	11.0449	0.0453801	0.929496	0.0885706
	41.18		PL1-LA-10	105.126	200.35	43.4952	1.12561	1704.49	173.201	12.0529	0.239194	0.980838	0.236081
	44.1		PL1-LA-11	105.652	196.541	11.7926	0.924826	2045.09	210.101	12.9224	0.323559	1.15888	-
	43.74		PL1-LA-12	160.789	84.9943	18.6921	4.16718	1657.54	136.474	14.6503	0.392609	0.836338	0.234024
	41.6		PL1-LA-13	164.673	115.406	22.7658	0.846683	1684.65	196.161	10.5897	0.209544	0.934133	0.0822039
	43.91		PL1-LA-14	87.387	127.51	10.8311	0.737691	2247.97	225.456	15.9929	0.322587	1.39195	-
	24.64	Mantle	PL1-LA-15	48.4696	27.5385	8.85038	1.31297	1388.14	196.36	5.95768	0.0849226	0.850991	-
	26.4		PL1-LA-18	40.4212	38.8128	15.1869	1.41582	1372.12	168.896	8.92422	0.0466575	0.607147	0.0456381
	26.53		PL1-LA-19	41.5118	30.9324	7.49772	0.821195	1385.47	182.718	8.00606	0.247077	0.759729	0.20086
	24.81		PL1-LA-22	38.0465	24.2296	11.5206	0.689392	1394.48	168.603	6.83465	0.0410137	0.820084	0.162476
	32.13	Resorption	PL1-LA-23	68.2742	40.5332	14.4391	1.78859	1535.6	197.885	7.94949	0.0512094	0.954875	0.0279382
	32.81		PL1-LA-25	49.1363	38.5529	11.1483	0.463054	1618.21	215.77	6.78756	0.0949703	0.856275	0.0130224
	30.96		PL1-LA-27	83.1271	46.2987	16.7967	3.63848	1549.1	234.813	8.25542	0.162284	0.877972	0.259221
	31.87		PL1-LA-28	63.0282	40.2138	8.3971	1.43473	1717.3	266.583	11.3932	0.19595	1.19735	0.100347
	33.35		PL1-LA-29	57.6818	60.4099	5.64712	1.27802	1540.89	326.891	22.3187	0.203995	1.38624	0.200911
	35.28		PL1-LA-30	59.6474	61.4346	11.2248	1.05791	1833.09	494.448	23.7721	0.263125	1.90284	-
	21.53	Rim	PL1-LA-39	30.8557	28.2848	5.90369	2.24366	1381.31	223.73	8.51468	0.0635457	0.894669	0.0622148
	25.51		PL1-LA-40	51.5715	34.0189	7.03987	1.04676	1308.79	249.78	10.4577	0.262917	1.09066	0.0703306
	24.24		PL1-LA-41	33.939	28.7364	5.54811	2.00841	1268.7	160.387	6.74614	0.140453	0.656998	0.0997562
	22.31		PL1-LA-42	49.0227	45.8884	14.9993	0.298773	1307.35	93.7697	16.3797	0.194635	0.956179	0.25887
	Table S3.2 Trace elements data (LA-ICP-MS) for PL2 plagioclase phenocryst
	An mol%	Comment	Sample	Mg (ppm)	Ti (ppm)	Mn (ppm)	Rb (ppm)	Sr (ppm)	Ba (ppm)	La (ppm)	Sm (ppm)	Eu (ppm)	Gd (ppm)
	22.78		PL2-LA-3	25.4386	30.5301	12.0345	2.58201	1225.22	217.263	5.73746	-	0.690973	0.0300538
	22.76		PL2-LA-6	26.2769	27.8504	6.62044	2.40905	1232.8	224.571	6.11059	0.0971499	0.636254	-
	23.85		PL2-LA-7	29.1483	30.0664	6.28454	2.18159	1265.39	252.129	6.83589	0.125277	0.718567	-
	24.98		PL2-LA-9	30.7336	42.0095	9.43113	1.96829	1240.79	260.149	11.3783	0.088832	0.83549	0.0576568
	29.03		PL2-LA-11	32.4915	50.5065	1.70285	1.67095	1306.38	259.594	17.266	0.0654148	0.845863	-
	24.21		PL2-LA-14	32.0671	38.4215	6.53699	1.88164	1287.49	289.125	13.8217	0.00699406	0.869569	0.0899045
	27.64		PL2-LA-16	30.5518	52.9297	5.69092	1.94158	1226.54	293.627	11.739	0.0217755	0.793062	-
	25.56		PL2-LA-17	35.8006	44.9738	5.89121	1.93148	1314.78	261.937	13.3573	0.0514125	0.751399	-
	23.77		PL2-LA-18	20.0204	31.0127	16.547	3.46241	1316.77	264.703	8.32396	0.0239812	0.899145	-
	22.28		PL2-LA-19	35.3639	30.9663	7.13315	2.41944	1305.44	247.023	5.69239	0.0985766	0.83501	0.252891
	21.61		PL2-LA-20	33.8534	24.9634	6.89094	1.04738	1284.73	235.413	5.96213	0.0774743	0.690287	0.090412
	23.45		PL2-LA-21	31.5184	36.4297	5.97978	2.02903	1348.93	198.556	6.33444	0.137967	0.693841	-
	23.47		PL2-LA-24	25.3018	33.3016	6.42924	2.39026	1409.35	193.934	6.34798	0.023013	0.806403	0.129476
	23.3		PL2-LA-26	32.6737	38.9634	10.3328	2.29026	1364.9	194.434	6.74052	0.102701	0.817924	-
	22		PL2-LA-30	31.5832	32.891	11.7608	2.33218	1351.99	212.092	7.13101	0.15623	0.737933	0.0450988
	23.16		PL2-LA-34	25.7026	39.1636	8.70063	2.10158	1338.03	222.124	7.72066	0.0372286	0.727012	-
	33.72	Resorption	PL2-LA-35	73.5849	69.6734	14.8754	1.84207	1508.43	190.845	14.5354	0.135933	0.783534	0.191993
	29.82		PL2-LA-37	46.0741	56.2593	9.18027	2.80548	1417.63	212.897	14.9318	0.260137	0.920658	-
	27.3		PL2-LA-38	29.4373	46.0262	5.6777	1.28627	1411.36	219.081	13.5362	0.12762	0.947083	0.0655863
	21.71		PL2-LA-41	29.9038	29.1163	9.70348	1.95444	1367.14	247.555	7.92669	-	1.0424	0.0538504
	22.43		PL2-LA-42	37.5615	28.4265	2.1285	2.47839	1430.96	263.158	6.89084	-	1.2252	-
	32.28	Resorption	PL2-LA-45	57.1175	63.2614	4.18366	0.778816	1611.62	267.907	31.5016	1.66621	1.76601	0.963036
			Table S3.3 Trace elements data for analyzed BHVO-2G
			Sample	Mg (ppm)	Ti (ppm)	Mn (ppm)	Rb (ppm)	Sr (ppm)	Ba (ppm)	La (ppm)	Sm (ppm)	Eu (ppm)	Gd (ppm)
			BHVO-2G	47302.1	17236.5	1478.58	9.35859	398.216	130.235	14.3078	5.08231	1.89381	5.42847
			BHVO-2G	48353.8	18111.7	1521.15	9.58805	407.943	136.397	14.6237	5.91035	2.04708	5.53353
			BHVO-2G	47617.1	17586.8	1484.12	8.94195	395.446	131.853	14.2318	5.80606	1.94494	5.45898
			BHVO-2G	46170.1	17467.3	1432.08	8.91288	393.94	128.924	13.9647	5.48923	1.81391	5.93834
			BHVO-2G	45372	17109.6	1420.64	8.82866	385.135	126.406	13.4073	5.04544	1.88606	4.54499
			BHVO-2G	44445.9	16891.1	1390.71	8.64197	373.197	124.007	13.1773	5.02963	1.81567	4.97339
			BHVO-2G	42364.2	16125	1346.94	8.24807	361.777	118.801	12.8066	4.75885	1.71332	5.26482
			BHVO-2G	44227.5	16521.4	1392.8	8.86846	380.36	125.467	13.4986	4.73581	1.74085	5.34378
			Average	45731.6	17131.2	1433.38	8.92358	387.002	127.761	13.7522	5.23221	1.85695	5.31079
			1σ	1886.6	584.748	54.1109	0.383874	13.9563	5.00337	0.586439	0.421916	0.102326	0.384502
			Ref. Values	42780	16878	1317	9.2	396	131	15.2	6.1	2.07	6.16
			Table S3.4 Trace elements data for analyzed BIR-1G
			Sample	Mg (ppm)	Ti (ppm)	Mn (ppm)	Rb (ppm)	Sr (ppm)	Ba (ppm)	La (ppm)	Sm (ppm)	Eu (ppm)	Gd (ppm)
			BIR-1G	49798.4	4759.1	1201.28	0.0749594	86.3173	5.39349	0.438141	0.752112	0.389096	0.925661
			BIR-1G	51598.5	4957.64	1247.75	0.190918	88.4857	5.50298	0.419819	0.866007	0.328897	1.20802
			BIR-1G	51942.8	5091.26	1260.76	0.165703	88.3177	5.45779	0.50053	0.803449	0.390256	1.32108
			BIR-1G	57710.5	5662.2	1397.15	0.293103	102.481	5.97509	0.538324	0.901023	0.366823	1.48077
			BIR-1G	54487.5	5455.06	1313.88	0.0755246	94.8696	6.12044	0.488206	0.729538	0.386728	1.42551
			BIR-1G	52569.8	5169.55	1263.47	0.279554	91.8284	4.90202	0.480384	0.971831	0.379106	1.54957
			BIR-1G	51414.5	5042.07	1252.91	0.146952	91.0548	4.72586	0.447615	0.9064	0.442263	1.43668
			BIR-1G	53986.9	5262.46	1322.62	0.199057	96.0078	5.71708	0.433376	0.730901	0.349085	1.30364
			Average	52938.6	5174.92	1282.48	0.178221	92.4203	5.47434	0.468299	0.832658	0.379032	1.33137
			1σ	2274.21	266.546	56.1861	0.0761621	4.89722	0.45035	0.0377357	0.0858209	0.0313129	0.183908
			Ref. Values	56400	5449	1472	0.197	109	6.5	0.609	1.09	0.517	1.85
			Table S3.5 Trace elements data for analyzed BCR-2G
			Sample	Mg (ppm)	Ti (ppm)	Mn (ppm)	Rb (ppm)	Sr (ppm)	Ba (ppm)	La (ppm)	Sm (ppm)	Eu (ppm)	Gd (ppm)
			BCR-2G	20205.7	12602.9	1541.05	41.3453	302.922	606.197	21.1709	5.06438	1.59699	5.26541
			BCR-2G	22315.4	14094.9	1696.14	45.4644	333.028	669.851	22.9958	5.86658	1.68991	5.82217
			BCR-2G	21653.2	13797	1662.19	43.2369	322.4	652.64	22.5309	5.68531	1.67913	5.69601
			BCR-2G	20281.1	13018.6	1547.45	41.4236	305.91	618.658	20.9225	5.25934	1.55646	5.2698
			BCR-2G	22191	14272.9	1656.08	44.3497	328.772	655.518	22.2242	5.4896	1.66576	5.56539
			BCR-2G	20431.2	13156.6	1513.78	41.5072	305.358	613.708	20.3698	4.921	1.71498	5.09266
			BCR-2G	20505.9	13057.5	1527.06	40.5737	308.645	611.721	20.7538	5.11943	1.53062	5.03369
			BCR-2G	21191.4	13539.4	1607.51	43.0356	319.796	631.689	21.8129	5.43776	1.72092	4.58279
			Average	21096.9	13442.5	1593.91	42.6171	315.854	632.498	21.5976	5.35542	1.64435	5.29099
			1σ	810.257	543.68	66.1492	1.58577	10.8886	22.3595	0.874803	0.302748	0.0684628	0.375778
			Ref. Values	21360	13732	1550	47	342	683	24.7	6.59	1.97	6.71
