# Supplementary material for: Magmatic Processes of Granitoids in the Hongniu-Hongshan Porphyry-Skarn Copper Deposit, Southern Yidun Terrane, China: Evidence from Mineral Geochemistry
Source: MDPI journal article supplement (doi:10.3390/min12121559), 2022-12-02
Supplement: s1 [file s1 › Table S4 Collected whole-rock data of the Hongniu-Hongshan granitoids.xlsx]

## Sheet: Data summary
	Sample No.	HNDSTB3	HNDSTB4	HNBY8	HZK0906-B24	HZK0906-B25	HZK0906-B28	HZK0901-B46	HZK0906-B32	HZK0906-B33	HZK0906-29	HZK0901-47	HZK17-12-B36	HZK17-12-B37	HZK17-12-B50	HZK17-12-B60	7ZK51-B1	7ZK51-B2	7ZK51-B3	7ZK51-B4	ZK1712-1175	ZK1712-1248	ZK1712-1354	ZK1712-1478	ZK906-996	HS12-05	HS12-051	HS-800	HS-841	HS-887	HS-890
	SiO2	65.54	65.48	65.06	70.41	70.98	68.6	67.28	68.55	68.29	68.87	71.1	67.2	67.9	67.9	66.7	72.9	73.6	72.2	72.1	67.1	67.85	67.68	68.31	68.53	68.3	68.3	72.65	73.15	71.1	72.7
	Al2O3	15.03	15.58	15.24	14.25	13.04	14.37	13.89	13.76	14.21	14.35	14.51	14.65	14.35	14.85	14.85	13.5	13.35	14.05	14.6	14.79	14.23	14.45	13.84	14.04	13.6	13.6	13.94	13.51	14.68	14.48
	Fe2O3T	0.63	0.9	0.87	2.64	2.5	3.07	1.37	2.93	3.06	3.07	1.21	2.87	2.84	2.91	3.48	1.42	1.28	1.15	0.88	3.58	3.42	3.18	4.13	3.31	3.83	3.83	1.97	1.73	1.7	1.22
	MgO	1.41	1.24	1.47	0.78	0.89	1.19	0.56	0.98	1.08	1.09	0.46	1.06	0.98	0.94	1.16	0.51	0.54	0.42	0.47	1.06	0.86	0.99	1.27	1.27	0.77	0.77	0.47	0.26	0.31	0.34
	CaO	5.56	5.08	5.51	1.49	1.9	2.15	1.75	2.34	2.14	2.27	0.64	2.64	2.18	2.38	2.7	1.38	1.78	1.28	2.04	2.64	2.62	1.91	2.43	2.4	1.5	1.5	0.35	0.16	0.26	0.22
	Na2O	2.98	2.59	2.91	3.69	3.29	3.67	2.79	3.66	3.2	4.01	1.92	4.03	3.66	4.11	4.08	3.03	3.49	3.25	3.62	3.7	3.34	3.06	3.53	3.65	3.16	3.16	2.55	1.08	3.03	1.92
	K2O	5.41	6.14	5.68	4.38	3.97	4.27	6.13	4.17	4.64	4.1	6.41	3.98	4.55	4.17	4.01	4.79	3.17	5.5	4.18	4.28	4.98	6.03	3.91	4.37	5.44	5.44	5.29	7.87	6.58	6.62
	P2O5	0.37	0.39	0.38	0.23	0.21	0.26	0.19	0.23	0.24	0.24	0.14	0.28	0.26	0.25	0.3	0.13	0.14	0.12	0.11	0.28	0.29	0.28	0.3	0.29	0.23	0.23	0.21	0.1	0.15	0.13
	TiO2	0.71	0.74	0.72	0.49	0.47	0.53	0.43	0.49	0.52	0.51	0.34	0.54	0.51	0.48	0.61	0.3	0.32	0.28	0.26	0.61	0.67	0.68	0.65	0.62	0.5	0.5	0.44	0.36	0.42	0.38
	MnO	0.04	0.04	0.04	0.03	0.03	0.04	0.03	0.04	0.04	0.04	0.01	0.04	0.03	0.04	0.04	0.01	0.01	0.02	0.02	0.05	0.04	0.05	0.06	0.04	0.05	0.05	0.01	0.005	0.003	0.004
	LOI	1.54	1.42	1.45	1.14	2.31	1.41	3.45	2.42	2.15	0.96	2.53	0.95	0.87	0.77	0.97	0.98	0.97	0.72	0.79	1.4	1.14	1.22	1.19	1.17	1.67	1.67	1.66	1.3	1.33	1.53
	Total	99.22	99.6	99.33	99.53	99.59	99.56	97.87	99.57	99.57	99.51	99.27	98.24	98.13	98.8	98.9	98.95	98.65	98.99	99.07	99.48	99.44	99.54	99.6	99.7	99.1	99.1	99.54	99.55	99.56	99.54
	V																				45.33	42.58	45.23	46.06	41.38			51.4	27.9	30.9	31.1
	Cr	24.7	25.2	22.9	15.7	14.4	17.2	10.3	18.9	25.1	19.7	4.9	12	10	10	11	5	6	4	4	9.73	1.74	12.43	5.52	9.08	19.9	21.3	175	133	100	99.2
	Co	4.72	4.67	5.21	5.51	4.75	5.89	9.77	5.56	4.91	4.39	7.25	4.8	6.3	5.4	6.1	4.7	4.8	2.3	2.3	7.24	6.12	9.93	7.13	6.05			5.81	6.01	6.99	4.85
	Ni	8.82	8.86	8.83	7.8	7.66	10.15	7.76	9.28	9.59	8.69	4.23	7.2	8	7.6	9.6	4.7	5.9	3.3	2.9	10.27	8.45	17.1	11.41	13.38	6.67	6.73	11.8	7.1	6.37	5.71
	Rb	312	392	321	174	134	225	263	149	176	119	371	196.5	209	195	177	248	168	237	177	198.17	233.06	257.63	204.56	206.09	209	210	345	399	342	372
	Sr	591	527	545	391	304	572	430	323	440	395	189	585	551	558	631	256	291	337	317	471.67	342	602.89	562.68	325.58	483	487	126	129	185	158
	Y	18.4	19	17.5	10.8	11.2	14.6	15.1	12.9	15.4	12.6	16.1	15.7	15.5	14	17.6	20	18	11.8	14.1	12.86	6.95	10.48	14.17	11.12	17	16.9	10.9	8.33	13.3	10.8
	Zr	344	367	348	229	229	288	254	318	220	237	255	36	25	30	27	49	41	43	43	114.1	109.01	104.95	97.3	104.51	232	244	227	265	304	253
	Nb	41	42.9	40	29.1	29.5	32	33.7	28.9	33.8	29.4	33	41.5	33.3	32.1	39.3	34	36.4	34	33.2	36.82	35.98	36.16	39.87	41.07	39.8	40.7	27.94	32.78	33.12	28.48
	Ba	1064	1150	1239	879	514	1074	1034	400	851	654	911	870	1030	760	990	520	360	960	520	911.27	1243.52	1605.97	844.65	819.55	684	680	540	824	1140	1127
	La	72.2	80.2	85.6	54.8	48.9	82.8	58.5	56.8	58.8	60.6	80.6	77	64.9	73.3	80.2	61.1	48.5	53	45.7	66.03	41.1	70.47	75.15	102.83	58.5	57.8	54	58.4	85	79.1
	Ce	136.1	151.6	155.2	94.4	85.9	141.7	112.5	103.1	112.3	110	143.3	148.5	131.5	134.5	156	122.5	101.5	104.5	82.6	116.87	76.78	123.31	142.96	190.38	122	121	90.6	110	149	138
	Pr	14.34	15.45	15.57	9.24	8.91	14.28	11.6	10.65	11.47	10.63	14.2	14	12.8	11.9	15	11.6	10	9.6	7.9	11.34	6.45	11.88	14.19	15.44	12.5	12.4	9.2	11.43	14.97	13.85
	Nd	50.1	52.8	52.1	29.4	28.5	44.8	38.6	34.4	37.1	34.2	45.6	41	38.5	34.8	44.8	35.6	31.2	28.5	24.5	34.9	19.89	35.02	39.57	39.61	41.2	41.2	29	35.9	46.3	42.5
	Sm	7.85	7.92	7.7	4.08	4.27	6.27	5.91	5.1	5.6	4.84	6.98	6.1	5.8	5.1	6.8	6.3	5.5	4.8	4.4	6.85	3.85	7	7.65	6.77	5.97	5.84	4.27	5.02	6.68	5.93
	Eu	1.66	1.77	1.78	0.86	0.81	1.22	1.32	1	1.1	0.97	1.22	1.4	1.5	1.2	1.7	1.2	0.9	0.9	0.8	1.36	0.88	1.41	1.43	1.1	1.35	1.37	0.8	0.96	1.12	0.99
	Gd	5.55	5.69	5.52	3.1	3.1	4.43	4.26	3.7	4.3	3.54	4.88	4.5	4.4	3.8	5.1	5.1	4.5	3.5	3.5	4.67	2.49	4.4	5.38	4.48	4.51	4.72	3.75	4.02	5.54	4.77
	Tb	0.74	0.75	0.71	0.37	0.39	0.54	0.56	0.5	0.5	0.43	0.63	0.6	0.5	0.4	0.6	0.6	0.5	0.4	0.4	0.55	0.32	0.48	0.63	0.5	0.62	0.61	0.44	0.43	0.63	0.54
	Dy	3.66	3.62	3.48	1.87	2	2.71	2.87	2.3	2.7	2.16	3.14	2.8	2.7	2.4	3.3	3.3	3	2.1	2.3	2.55	1.44	2.14	2.88	2.2	2.81	2.84	1.96	1.71	2.68	2.15
	Ho	0.65	0.64	0.63	0.35	0.38	0.5	0.52	0.4	0.5	0.41	0.53	0.5	0.5	0.4	0.6	0.6	0.5	0.4	0.4	0.46	0.26	0.38	0.53	0.4	0.54	0.53	0.35	0.27	0.44	0.34
	Er	1.72	1.75	1.7	0.94	0.99	1.26	1.4	1.1	1.4	1.07	1.43	1.4	1.3	1.2	1.7	1.5	1.4	1	1.2	1.21	0.7	0.95	1.36	1.05	1.51	1.46	0.97	0.75	1.18	0.96
	Tm	0.23	0.24	0.24	0.13	0.14	0.18	0.19	0.2	0.2	0.16	0.2	0.3	0.2	0.2	0.2	0.2	0.2	0.1	0.1	0.16	0.1	0.13	0.19	0.15	0.2	0.21	0.14	0.1	0.17	0.13
	Yb	1.5	1.44	1.47	0.87	0.93	1.16	1.25	1.1	1.3	1.05	1.24	1.3	1.2	1.1	1.4	1.2	1.2	0.9	1.1	1.08	0.63	0.82	1.25	0.98	1.41	1.34	0.92	0.7	1.09	0.86
	Lu	0.21	0.21	0.22	0.14	0.15	0.18	0.17	0.2	0.2	0.17	0.17	0.2	0.2	0.2	0.2	0.2	0.2	0.1	0.1	0.16	0.1	0.13	0.19	0.16	0.21	0.21	0.15	0.11	0.16	0.14
	Hf	7.9	8.4	8.07	5.53	5.64	6.2	6.45	6.9	5.3	5.86	6.52	1.2	0.8	1	1	1.6	1.4	1.5	1.5	3.06	3.12	2.85	2.73	3.01	5.84	6.08	6.11	6.97	7.63	6.31
	Ta	2.29	2.43	2.25	2.05	1.99	2.11	2.33	1.9	2.3	2.06	2.42	2.32	2.24	2.06	2.53	3.23	3.12	2.96	3.26	2.03	1.83	2.02	2.18	2.13	2.15	2.09	2.29	2.41	2.37	2.01
	Pb	14	9.5	15.2	14	13	15.6	27.6	47	50.2	12.6	16.8	16.3	17.9	17.8	15.5	19.6	13.9	18.6	32.6	12.57	41.51	21.81	16.67	23.5	19.3	19.5	16	18.4	14.7	22.8
	Th	29.8	30.4	27.1	27.8	28.3	38.8	32.2	29.8	33	31.4	40.4	34.4	31.3	34.6	30.2	35.5	34.4	35.7	36.4	28.17	19.4	30.5	31.58	40.11	28.1	28.5	31.8	33.5	37.2	33.3
	U	6.7	6.04	5.92	9.35	14.57	13.53	8.13	7.6	10.54	10.94	10.24	11.6	8.4	7.6	5.7	11.7	12.3	9.3	10.3	8.06	7.93	9.34	17.16	10.38	7.23	7.36	10.18	6.41	7.9	6.45
		Literature data are from：
		Huang, X.X., Xu, J.F., Chen, J.L., Ren, J.B., 2012. Geochronology,geochemistry and petrogenesis of two periods of intermediate-acid intrusive rocks from Hongshan area in Zhongdian arc. Acta Petrologica Sinica 28, 1493-1506 (in Chinese with English abstract).
		Peng, H.J., 2014. Metallogeny of the Hongniu-Hongshan porphyry-skarn copper deposit and the porphyry-skarn metallogenic system of the Yidun island arc, Yunnan, SW China. Chinese Academy of Geological Sciences. PhD thesis (in Chinese with English abstract).
		Wang, X.S., Bi, X.W., Leng, C.B., Zhong, H., Tang, H.F., Chen, Y.W., Yin, G.H., Huang, D.Z., Zhou, M.F., 2014. Geochronology and geochemistry of Late Cretaceous igneous intrusions and Mo–Cu–(W) mineralization in the southern Yidun Arc, SW China: implications for metallogenesis and geodynamic setting. Ore Geology Reviews 61, 73-95.
		Yang, L.Q., Deng, J., Dilek, Y., Meng, J.Y., Gao, X., Santosh, M., Wang, D., Yan, H., 2016. Melt source and evolution of I-type granitoids in the SE Tibetan Plateau: Late Cretaceous magmatism and mineralization driven by collision-induced transtensional tectonics. Lithos 245, 258-273.
